# Supplementary material
Source: PubMed Central journal article supplement (PMC4160434)
Supplement: NIHMS559594-supplement-01.pdf [file NIHMS559594-supplement-01.pdf]

Type of file: figure

Label: 10

Filename: figure\_10.jpg

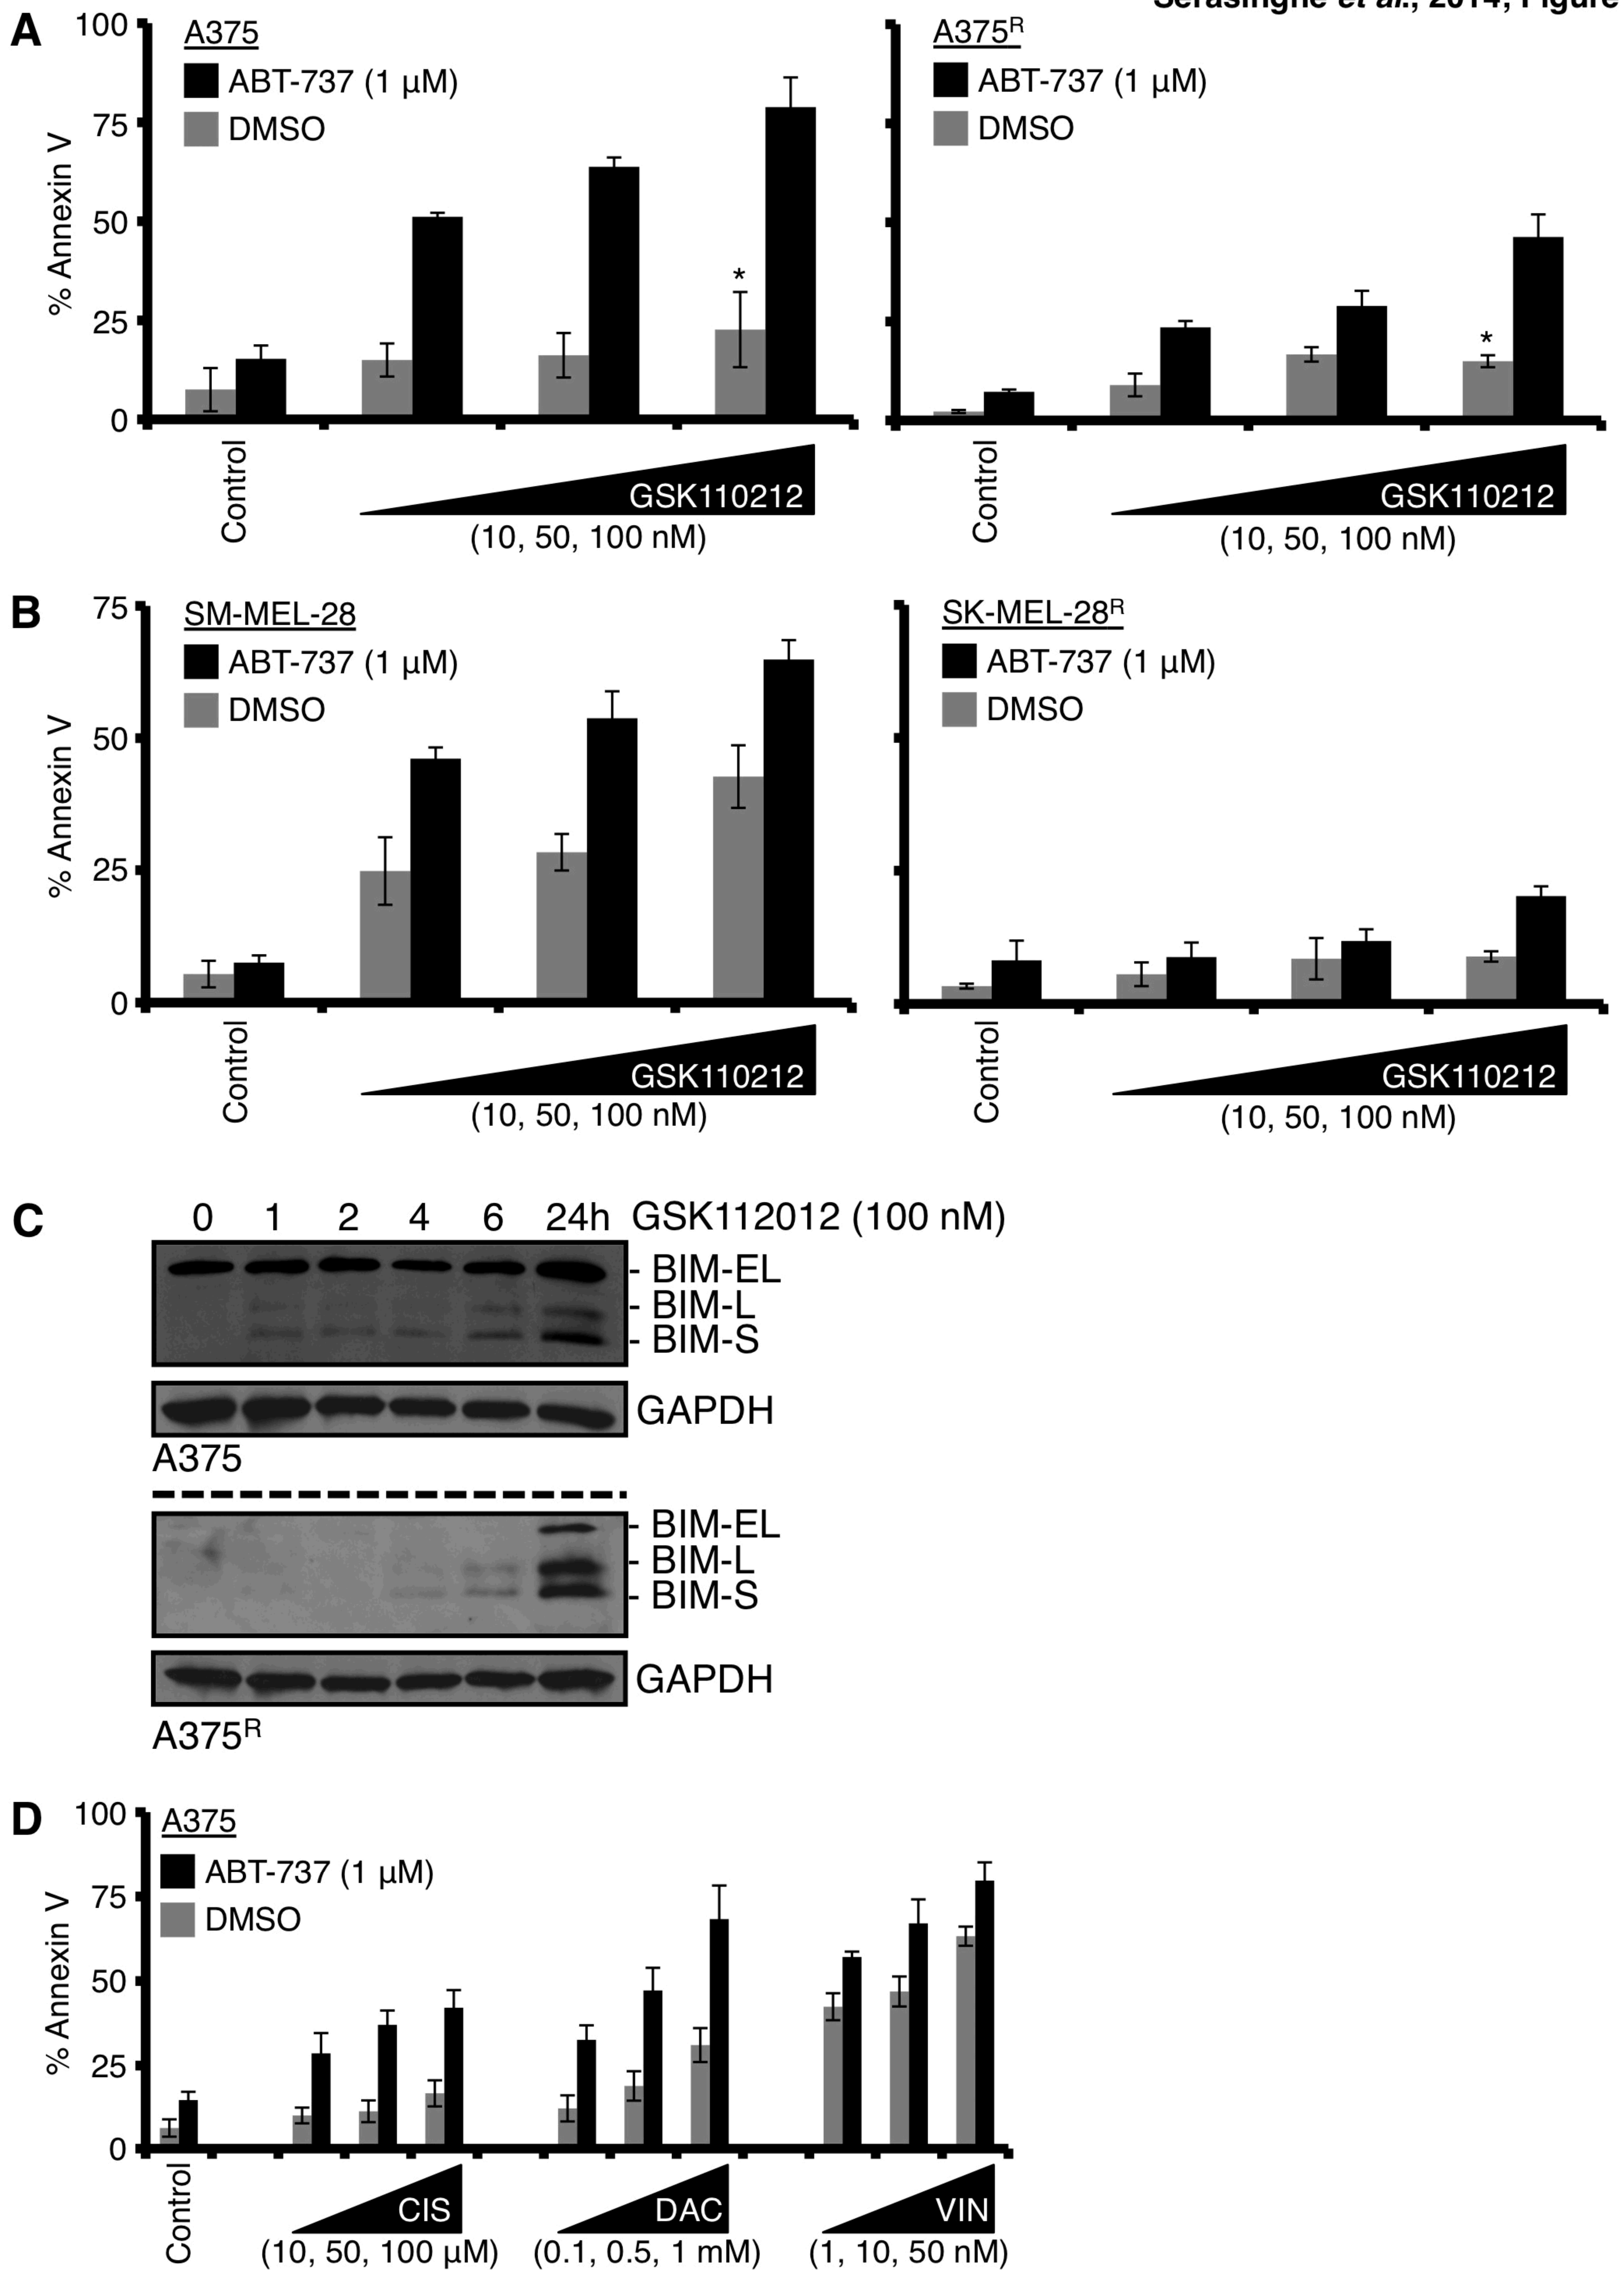

Type of file: figure

Label: 11

Filename: figure\_11.jpg

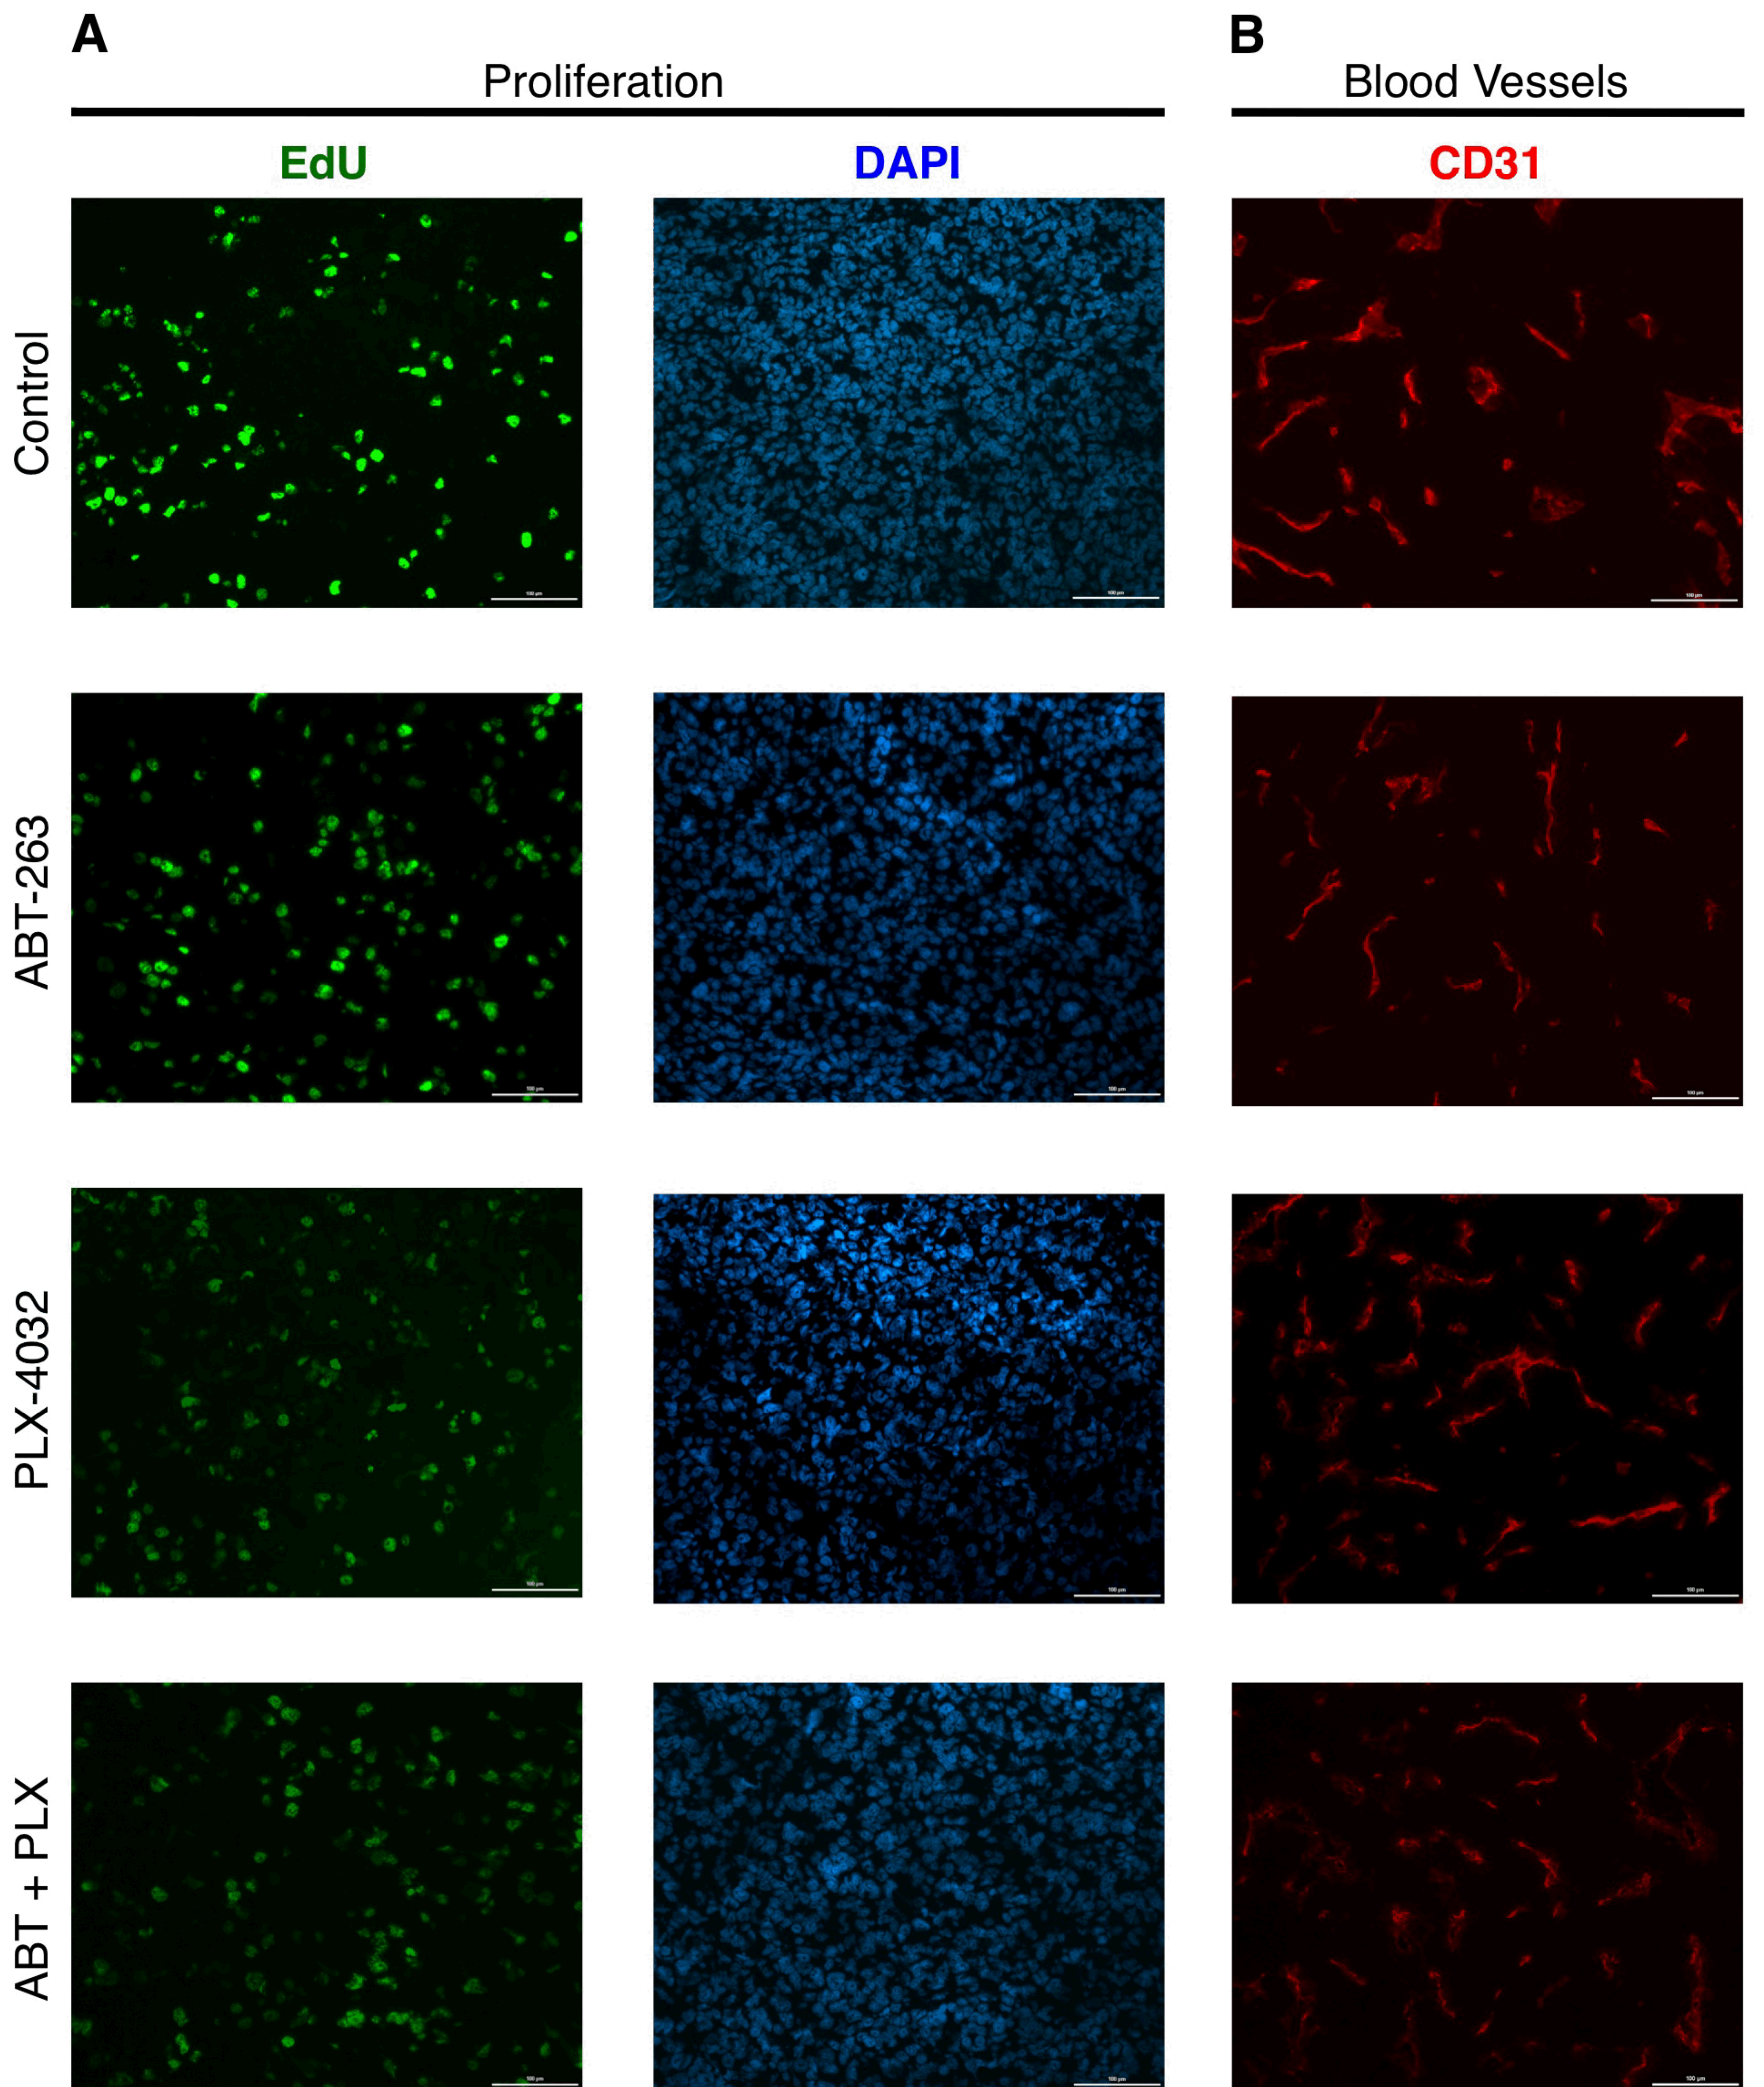

Type of file: figure

Label: 12

Filename: figure\_12.jpg

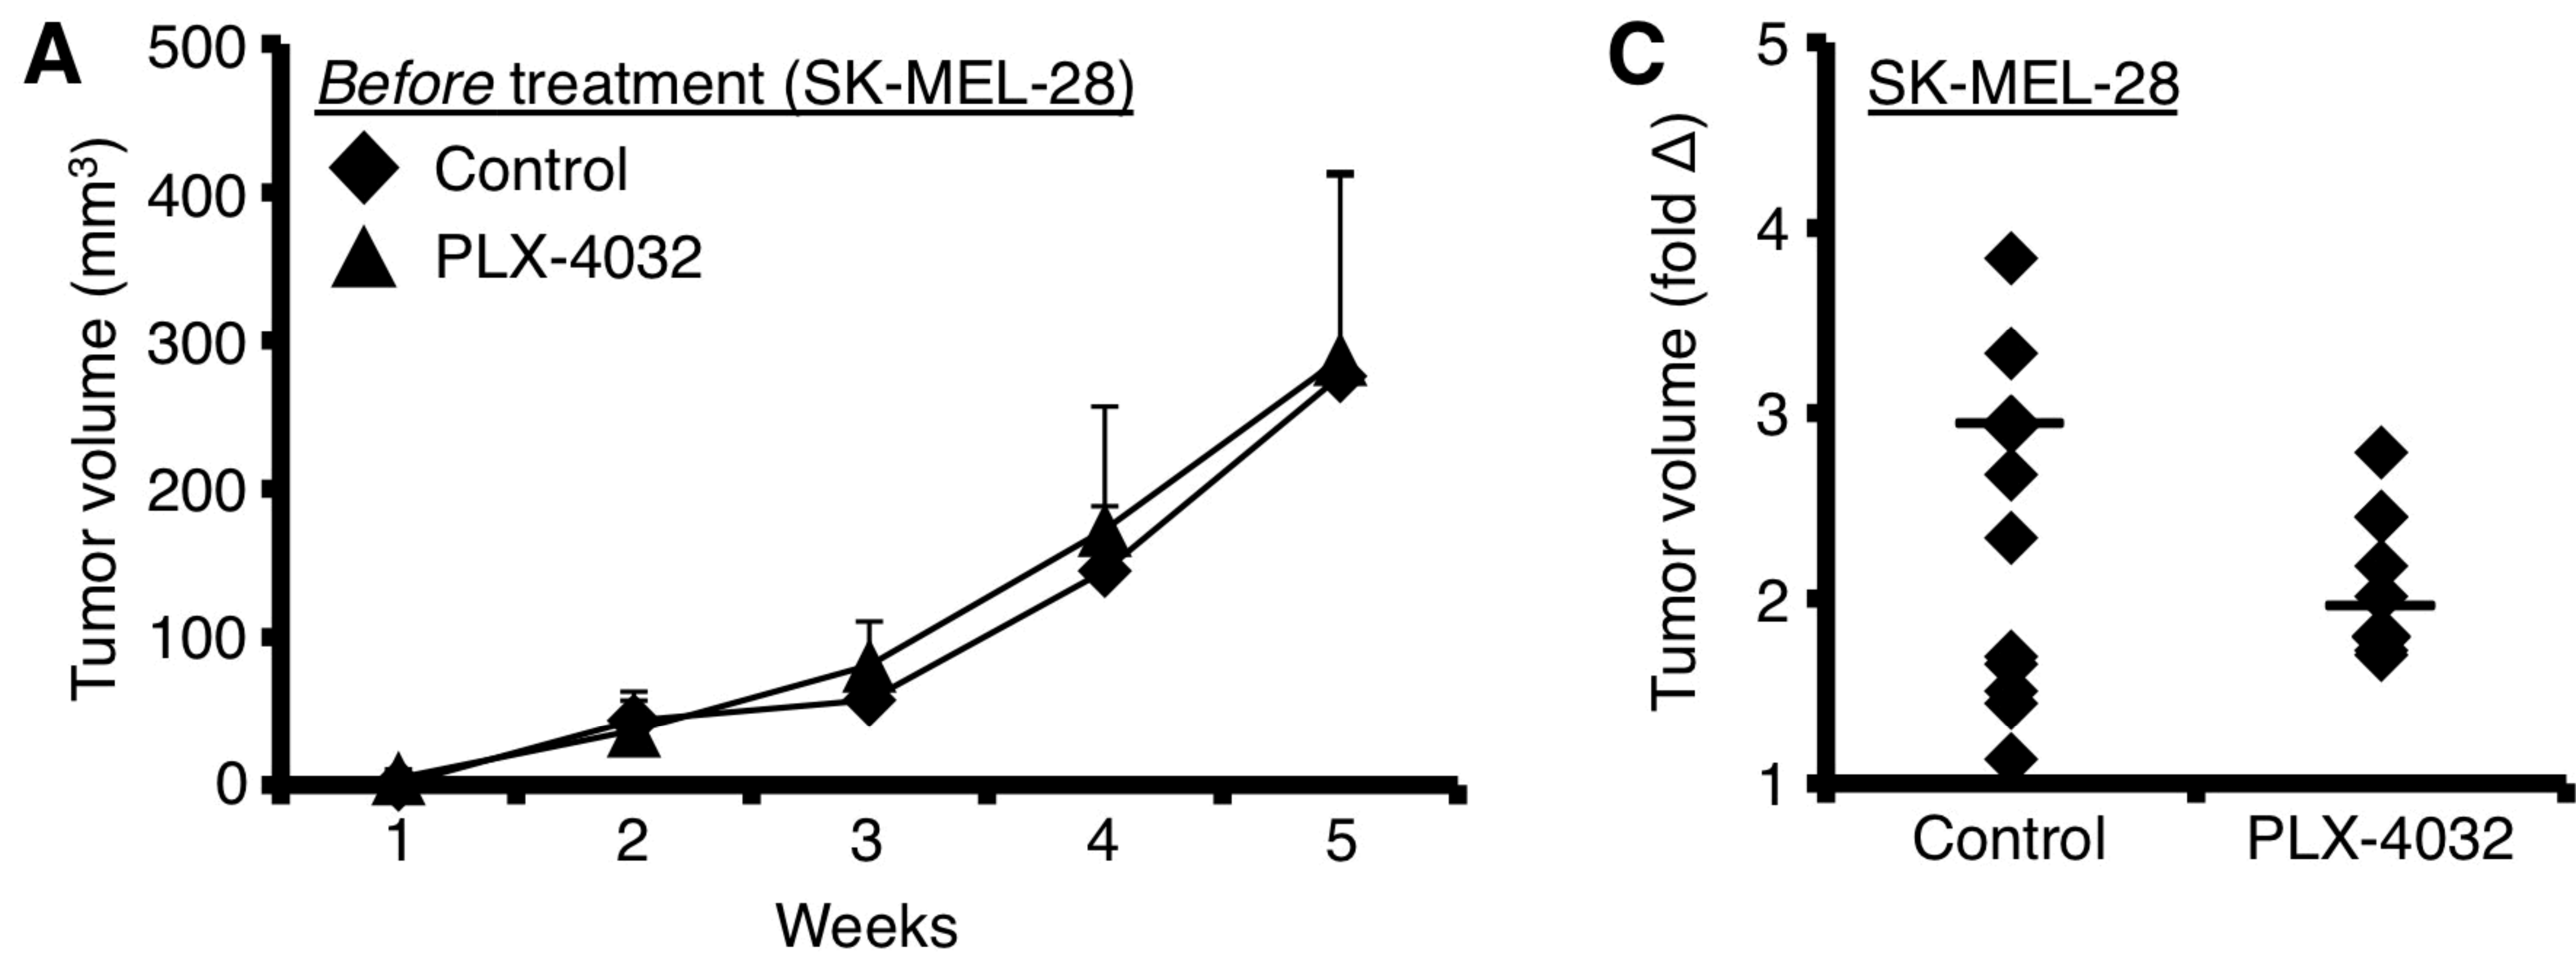

**B**

| TUMOR SIZE in mm <sup>3</sup> [Average (STD); Range] | SK-MEL-28 <sup>R</sup> |                      |
|------------------------------------------------------|------------------------|----------------------|
|                                                      | Day 1                  | Sacrifice            |
| Control                                              | 231 (117); 109 - 404   | 460 (197); 265 - 771 |
| ABT-263                                              | 269 (141); 103 - 478   | 381 (194); 161 - 765 |
| PLX-4032                                             | 248 (141); 110 - 566   | 524 (221); 292 - 958 |
| ABT + PLX                                            | 209 (172); 68 - 431    | 279 (177); 101 - 420 |

Type of file: figure

Label: 7

Filename: figure\_7.jpg

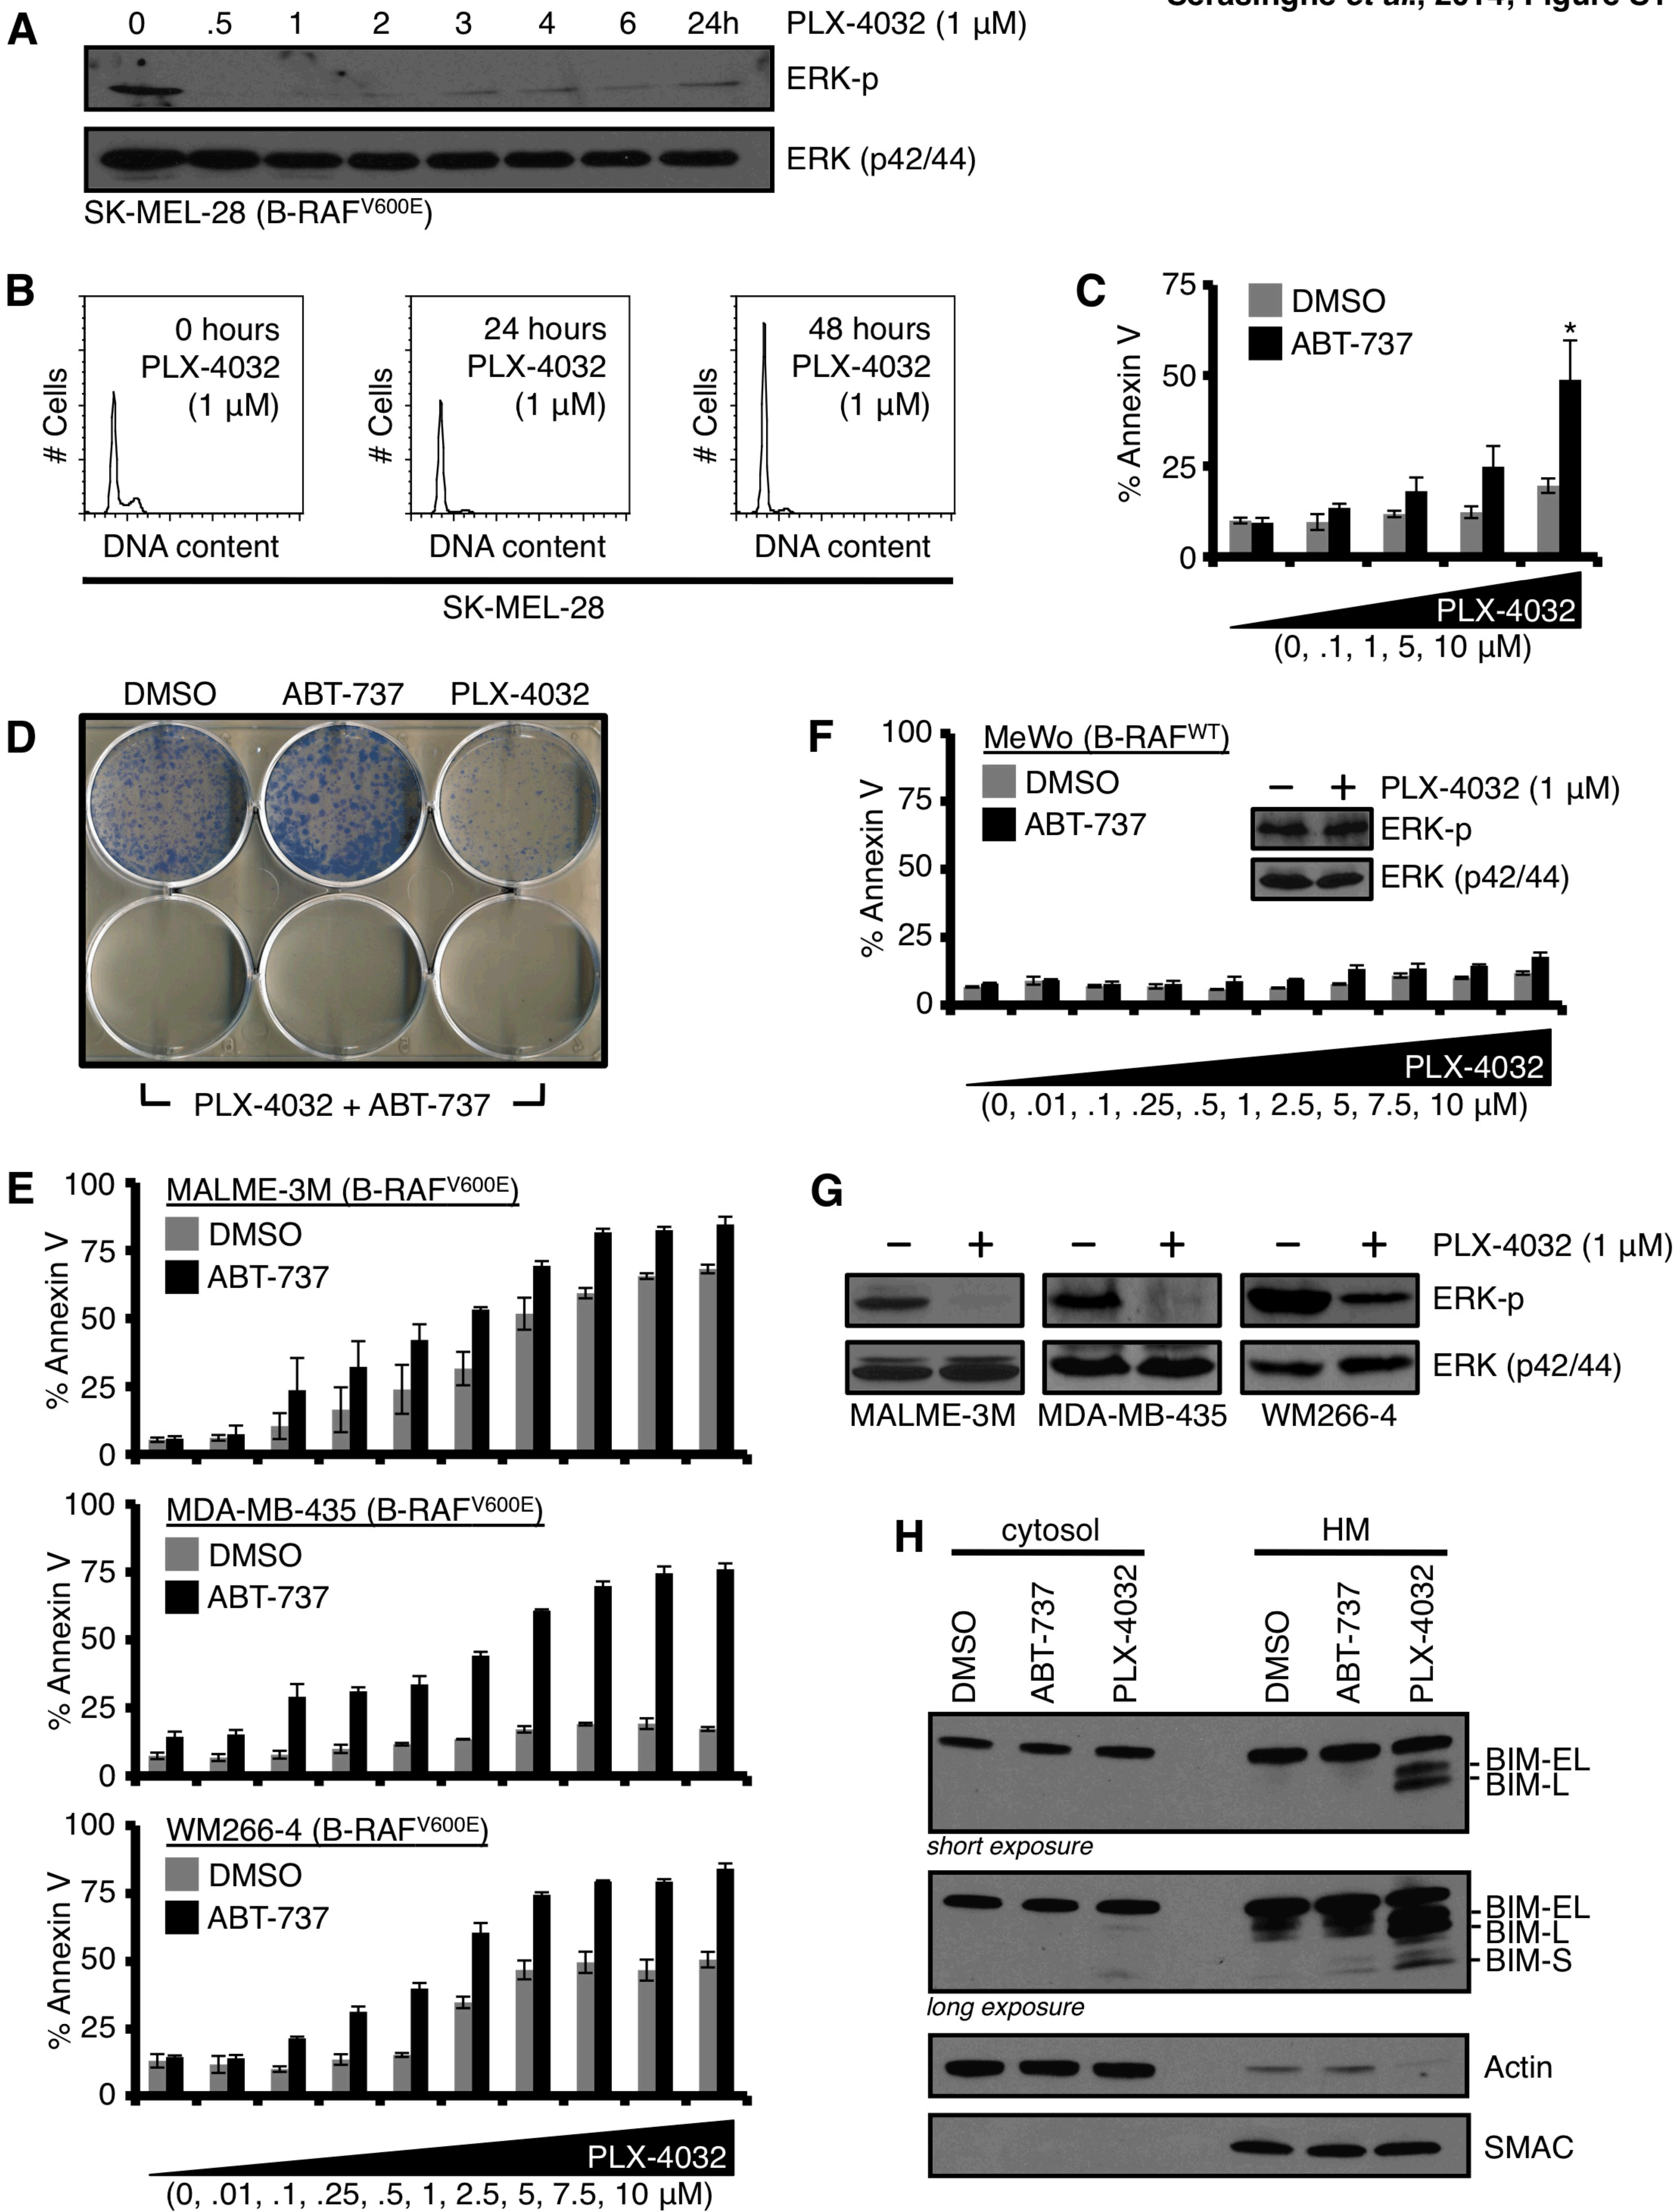



Type of file: figure

Label: 8

Filename: figure\_8.jpg

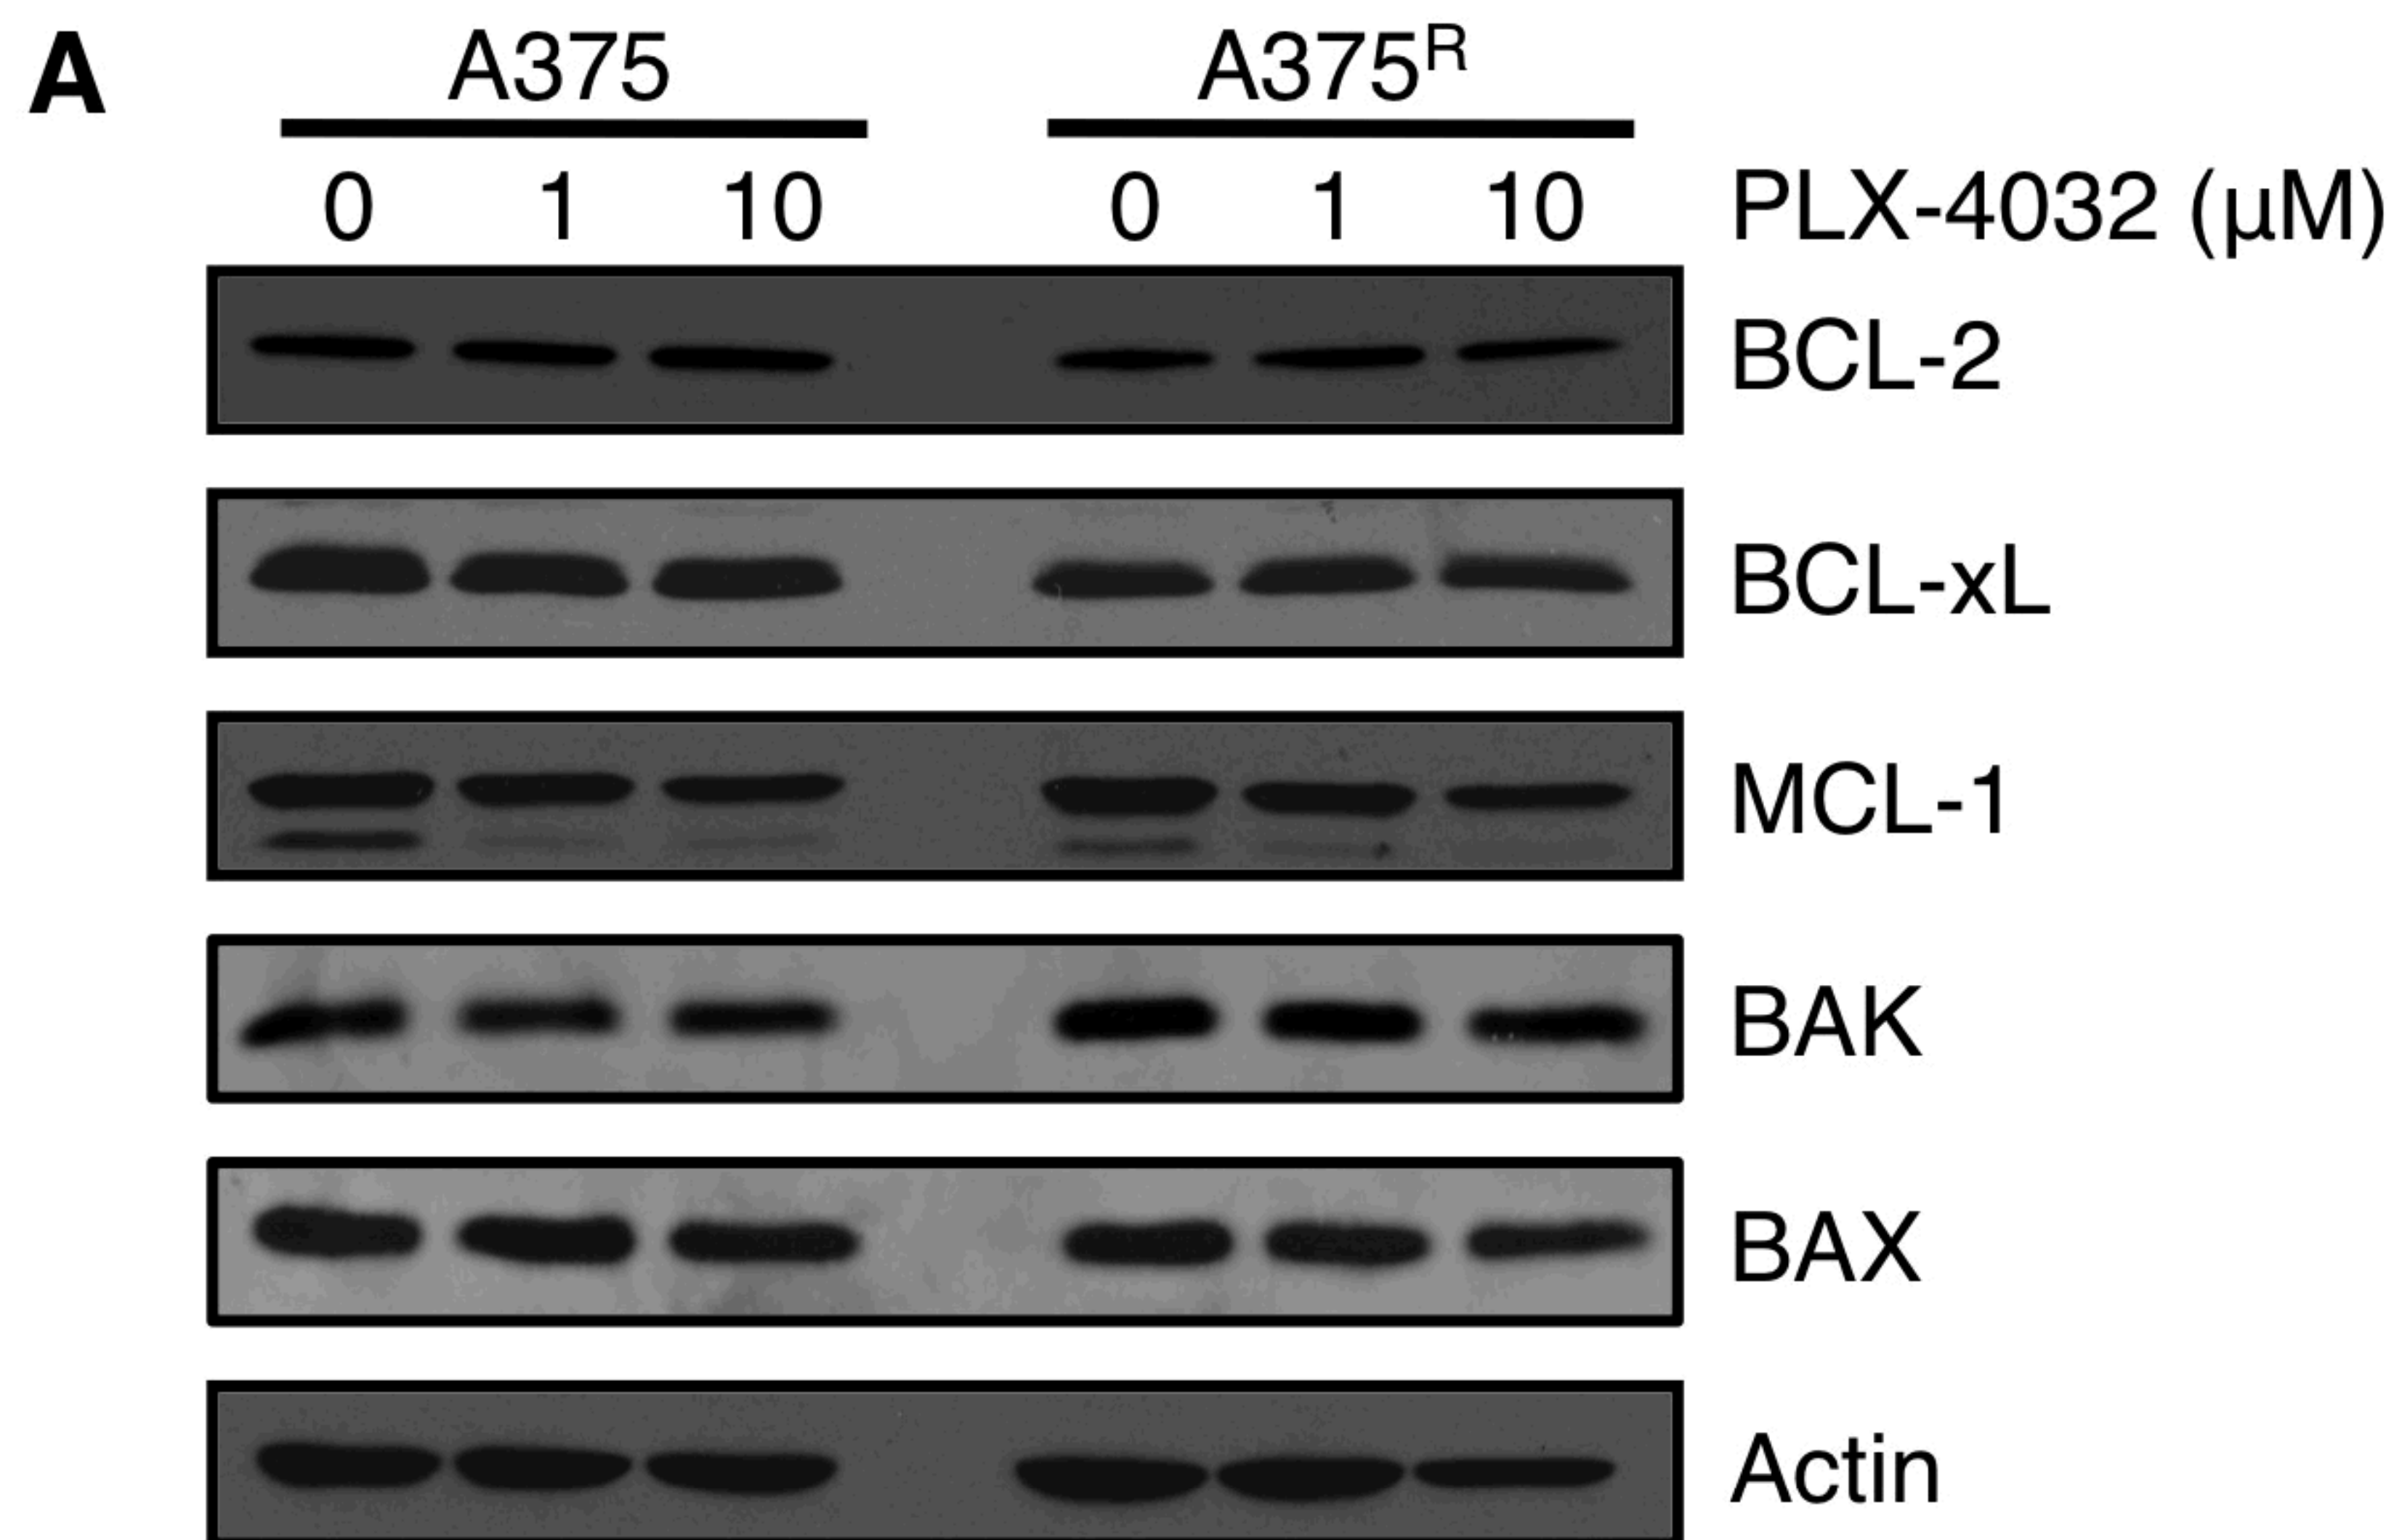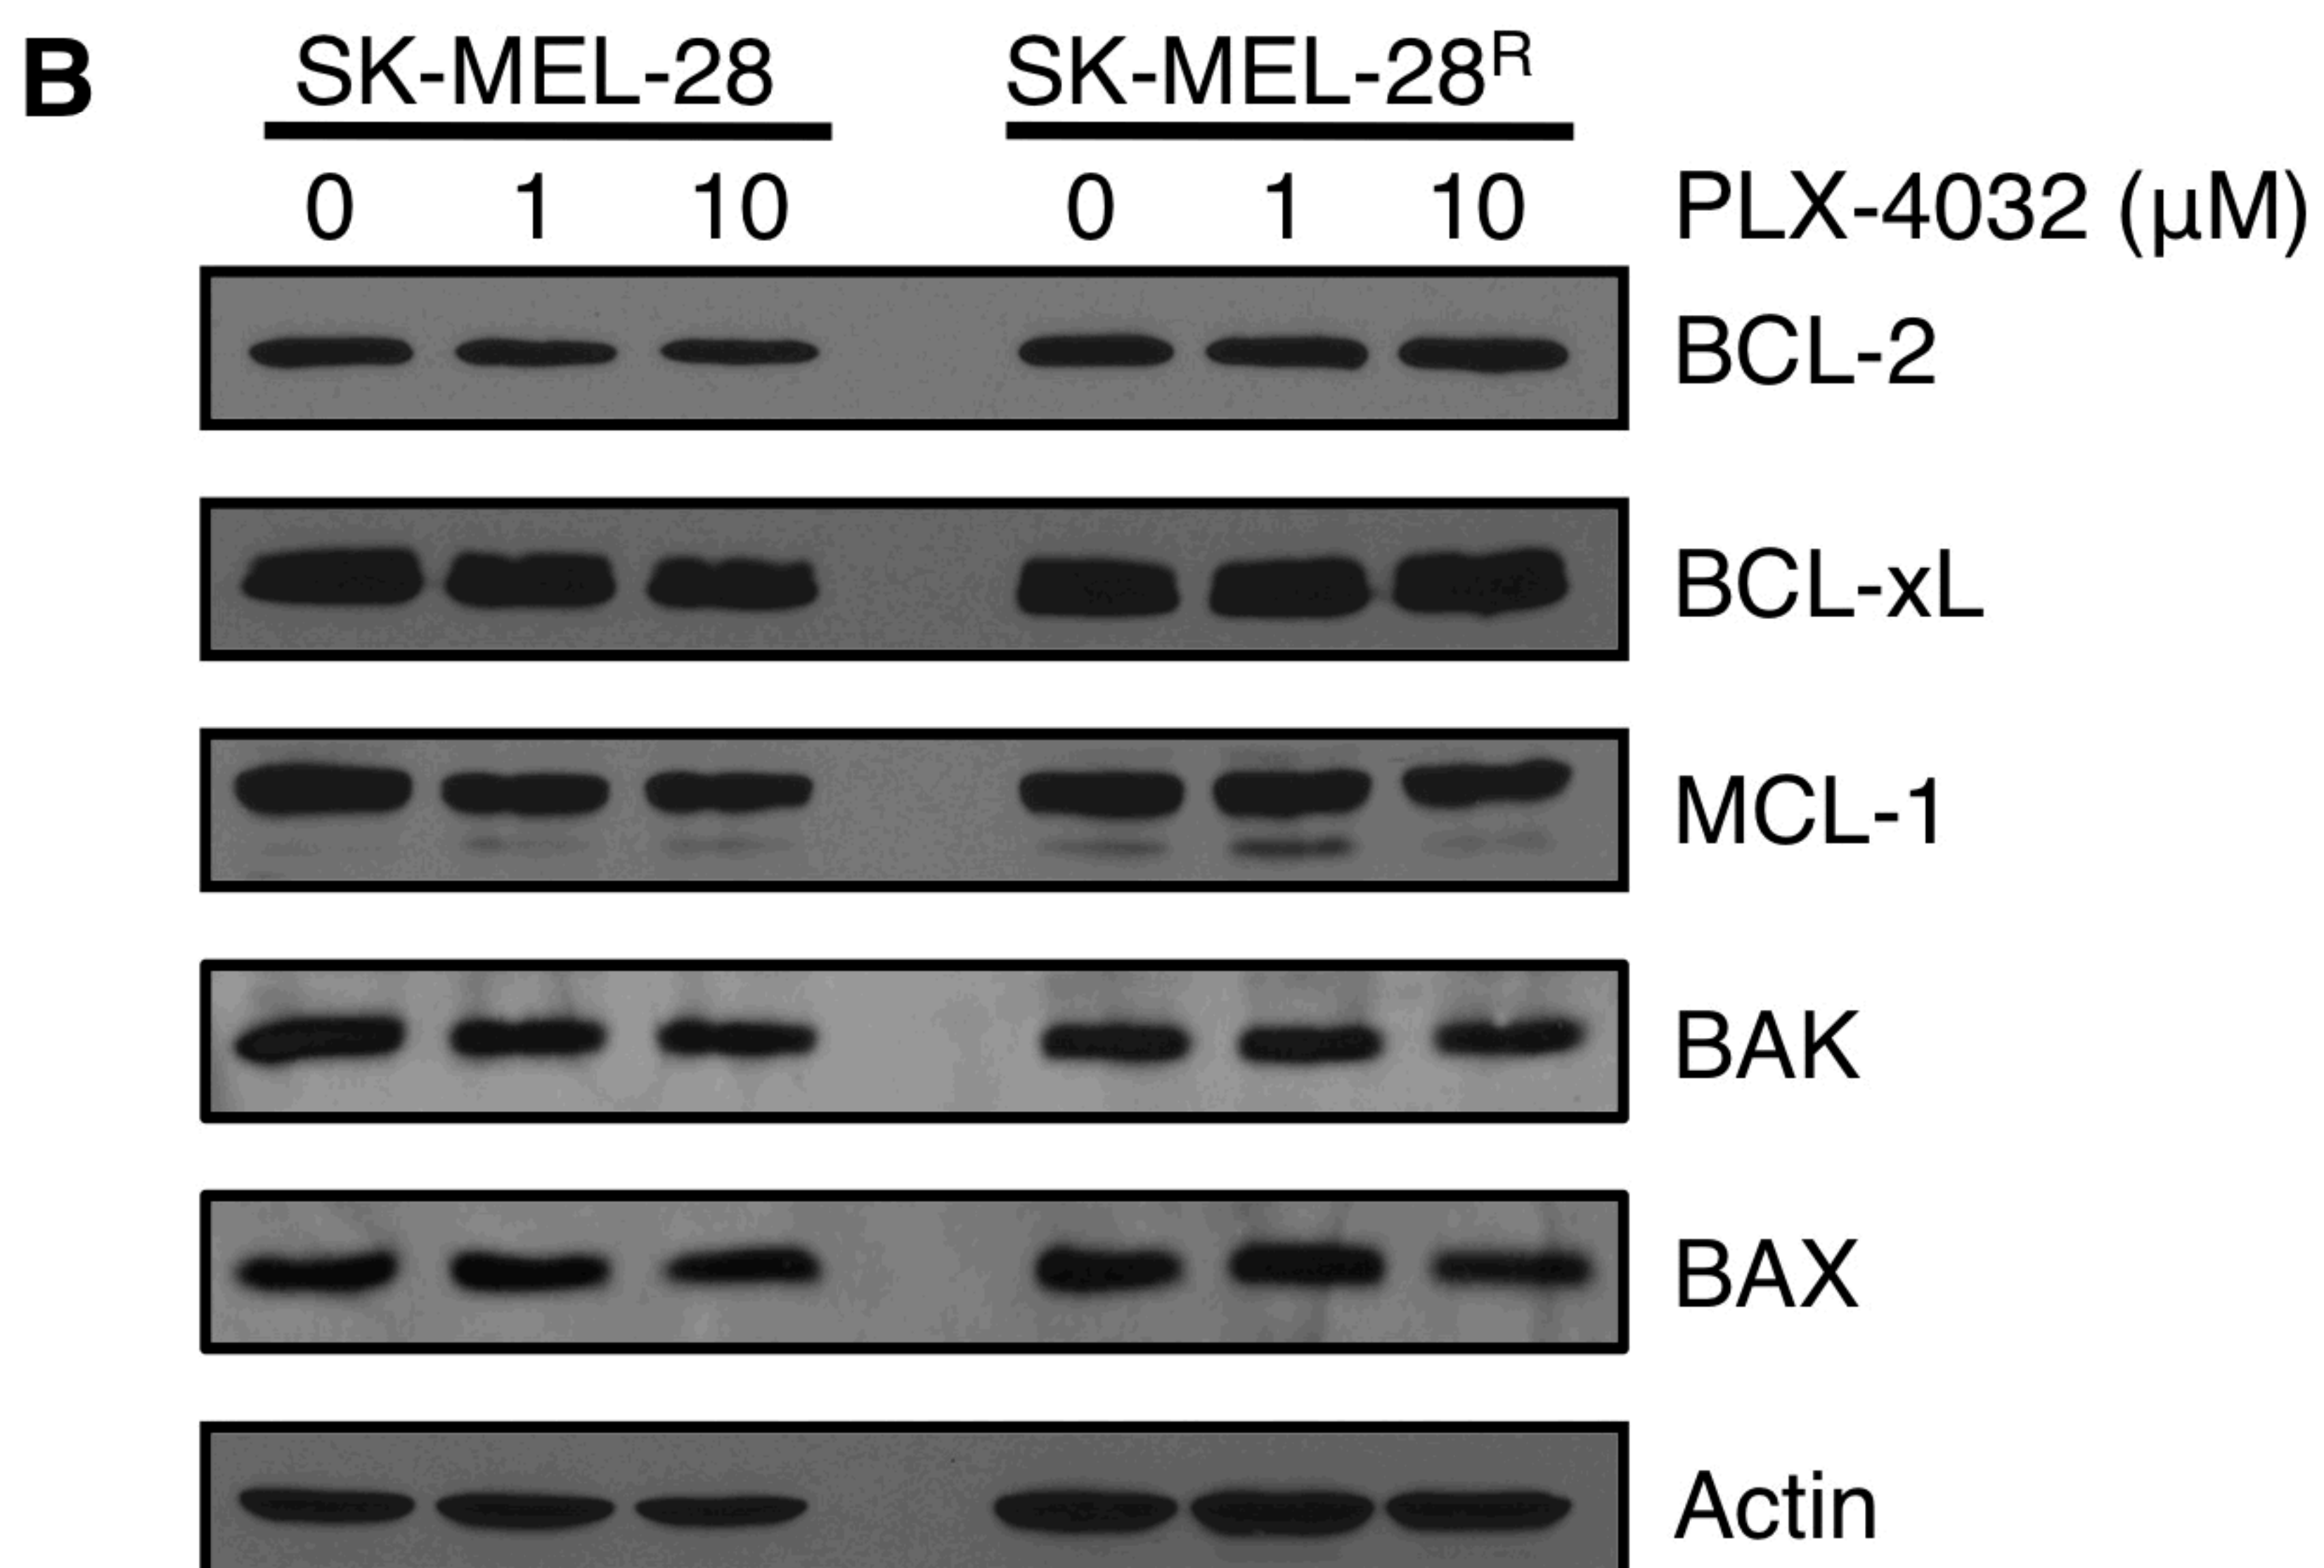

Type of file: figure

Label: 9

Filename: figure\_9.jpg

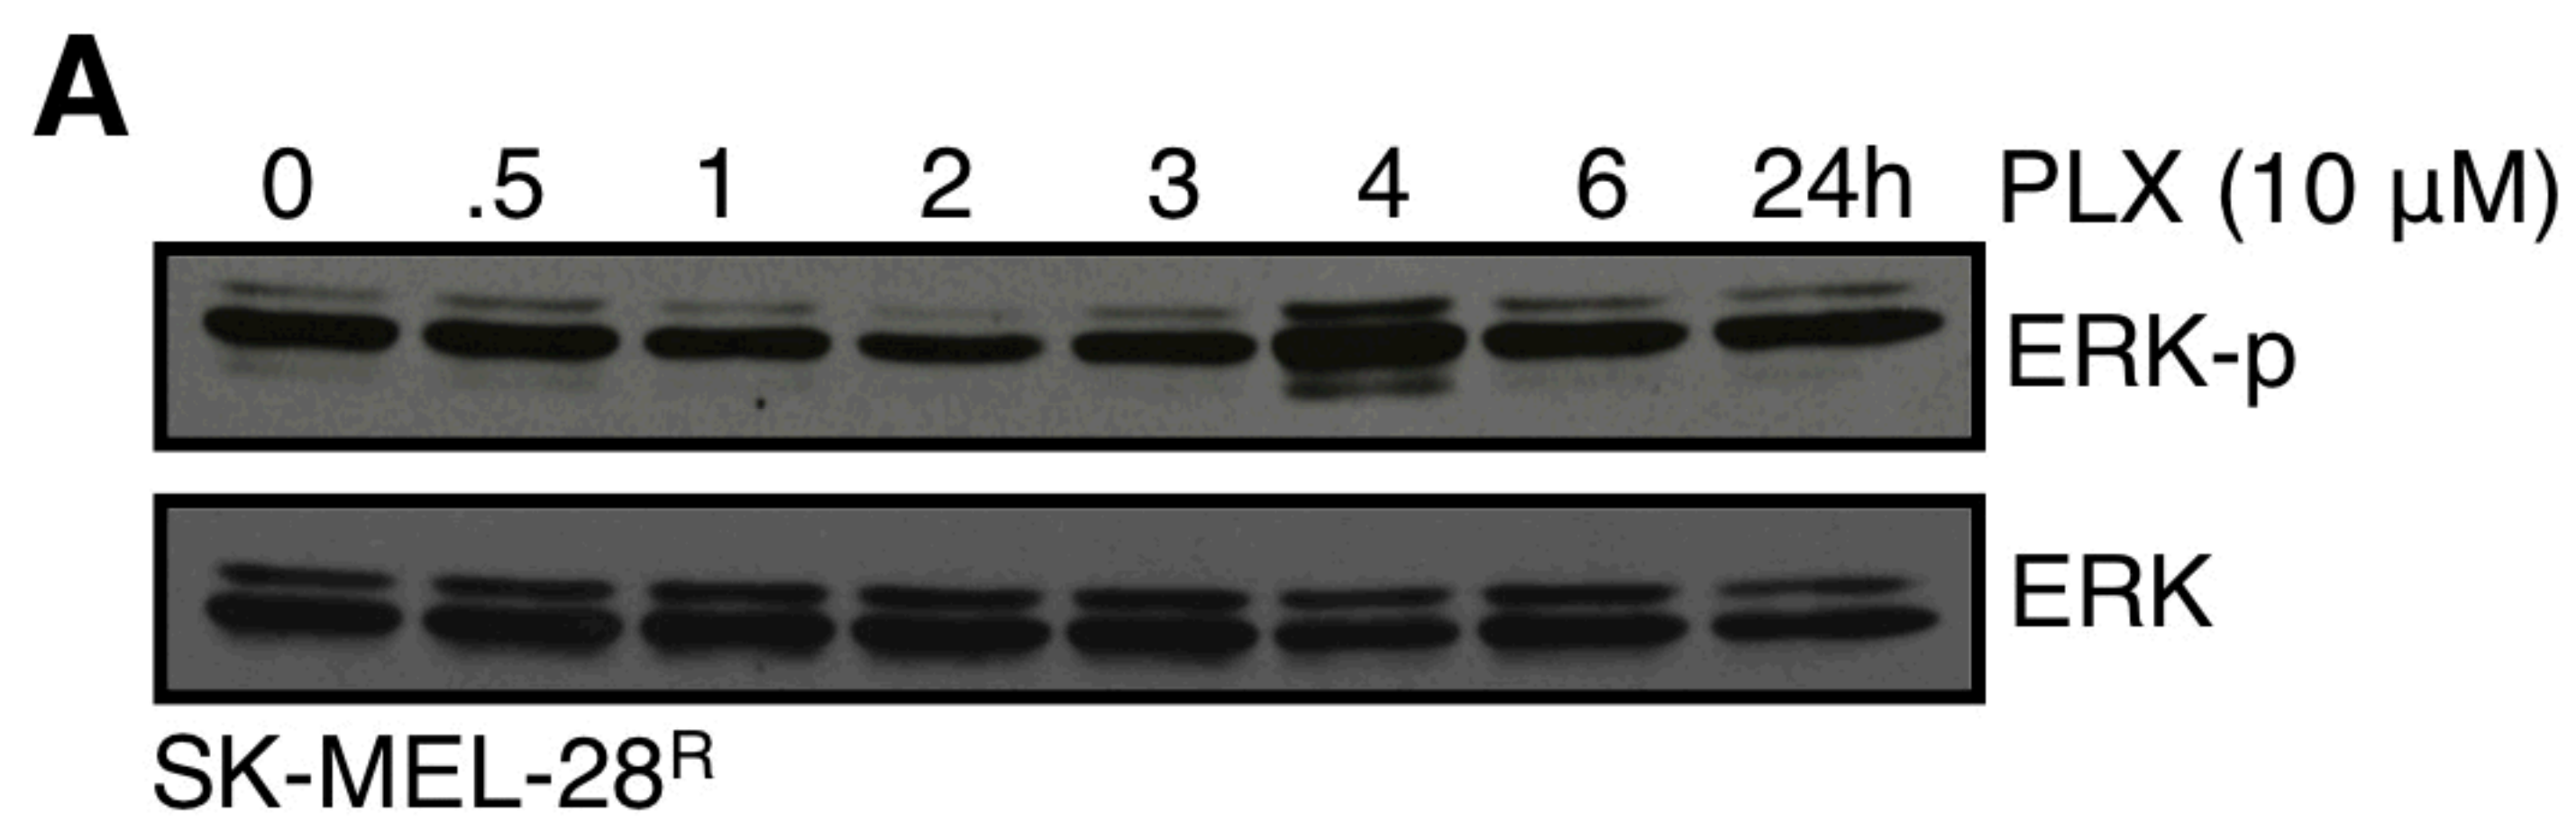

**B**

| SK-MEL-28 <sup>R</sup> | %G1     | %S    | %G2     |
|------------------------|---------|-------|---------|
| DMSO                   | 62 (64) | 8 (7) | 25 (26) |
| PLX (1 $\mu$ M)        | 61 (85) | 9 (4) | 25 (7)  |
| PLX (10 $\mu$ M)       | 70      | 6     | 18      |

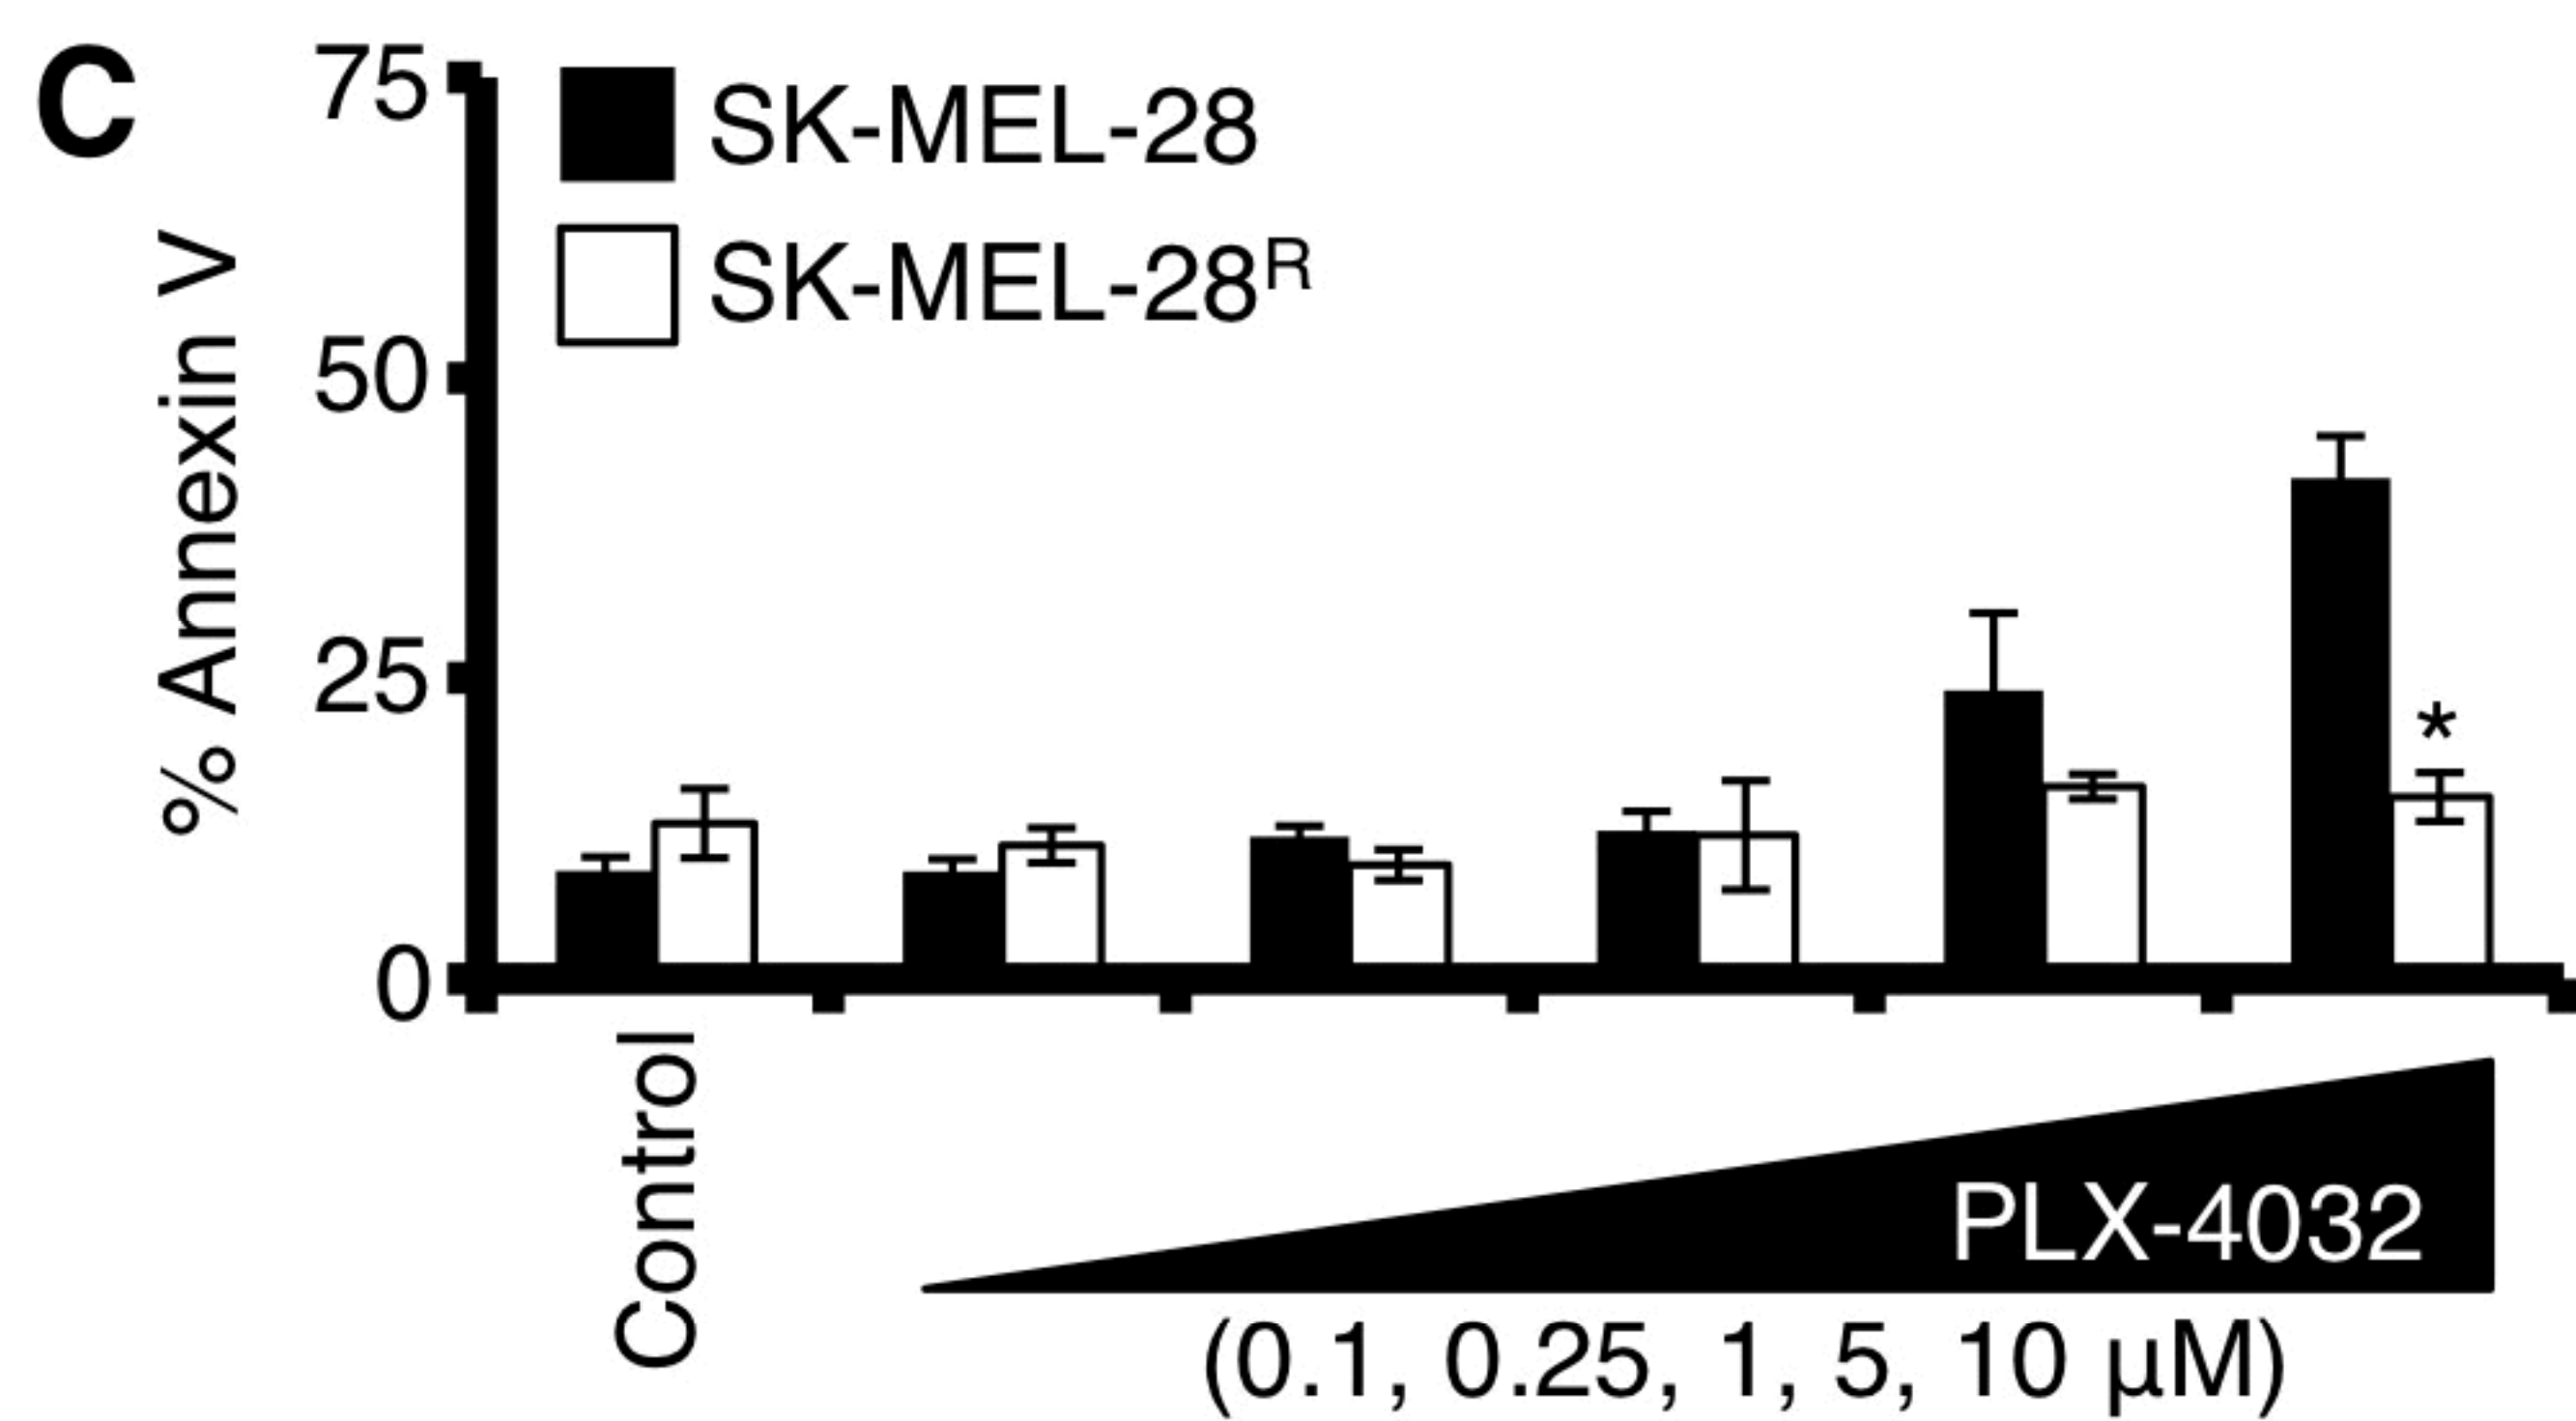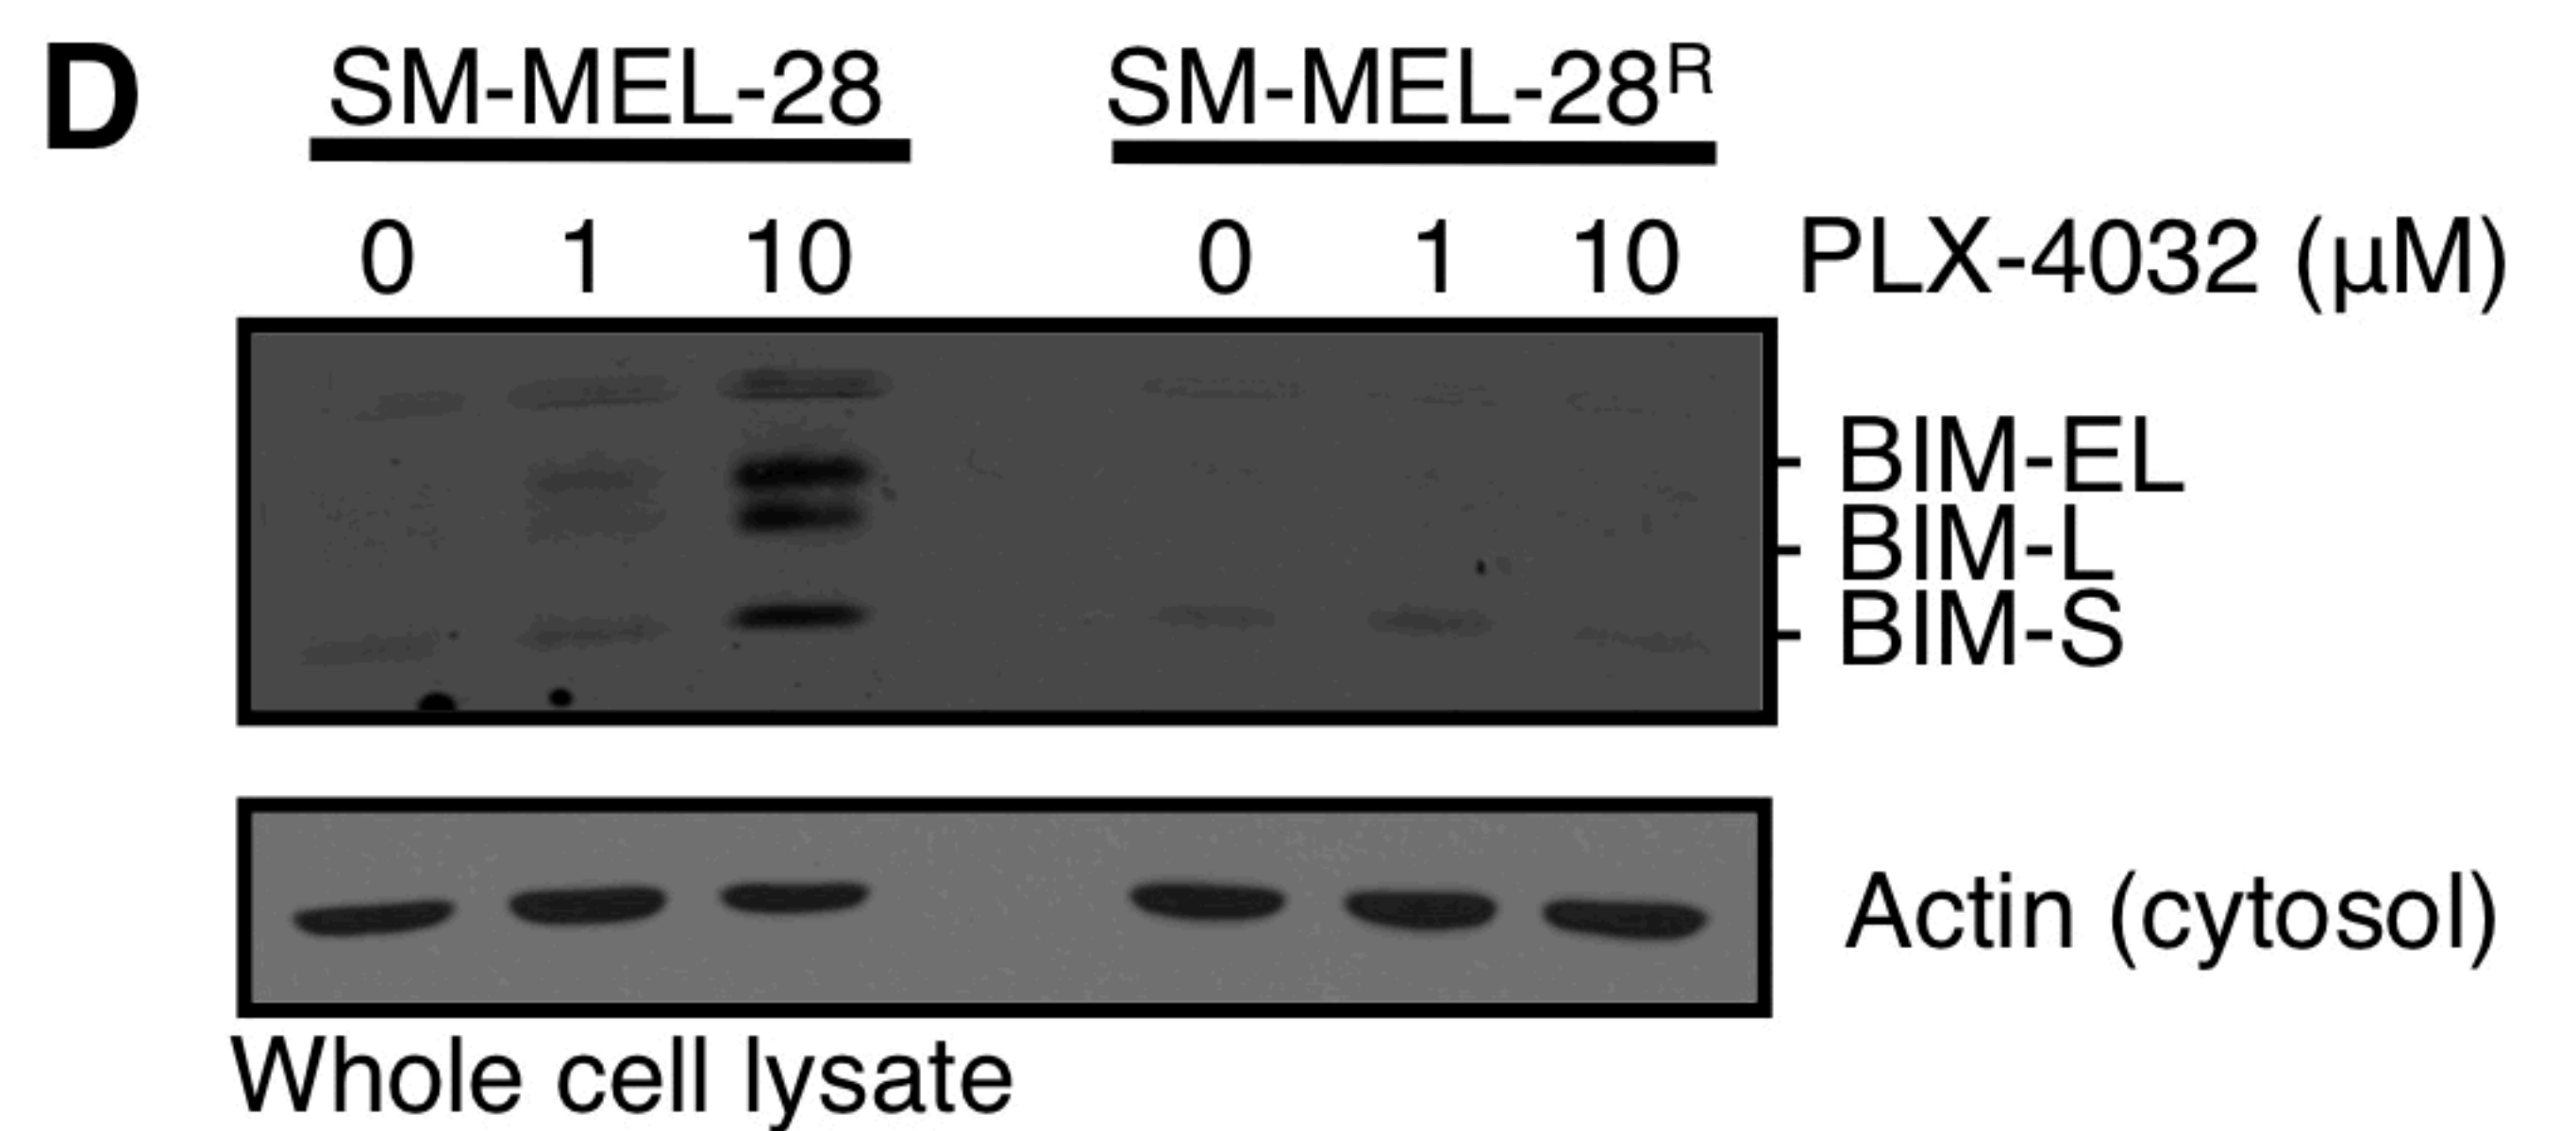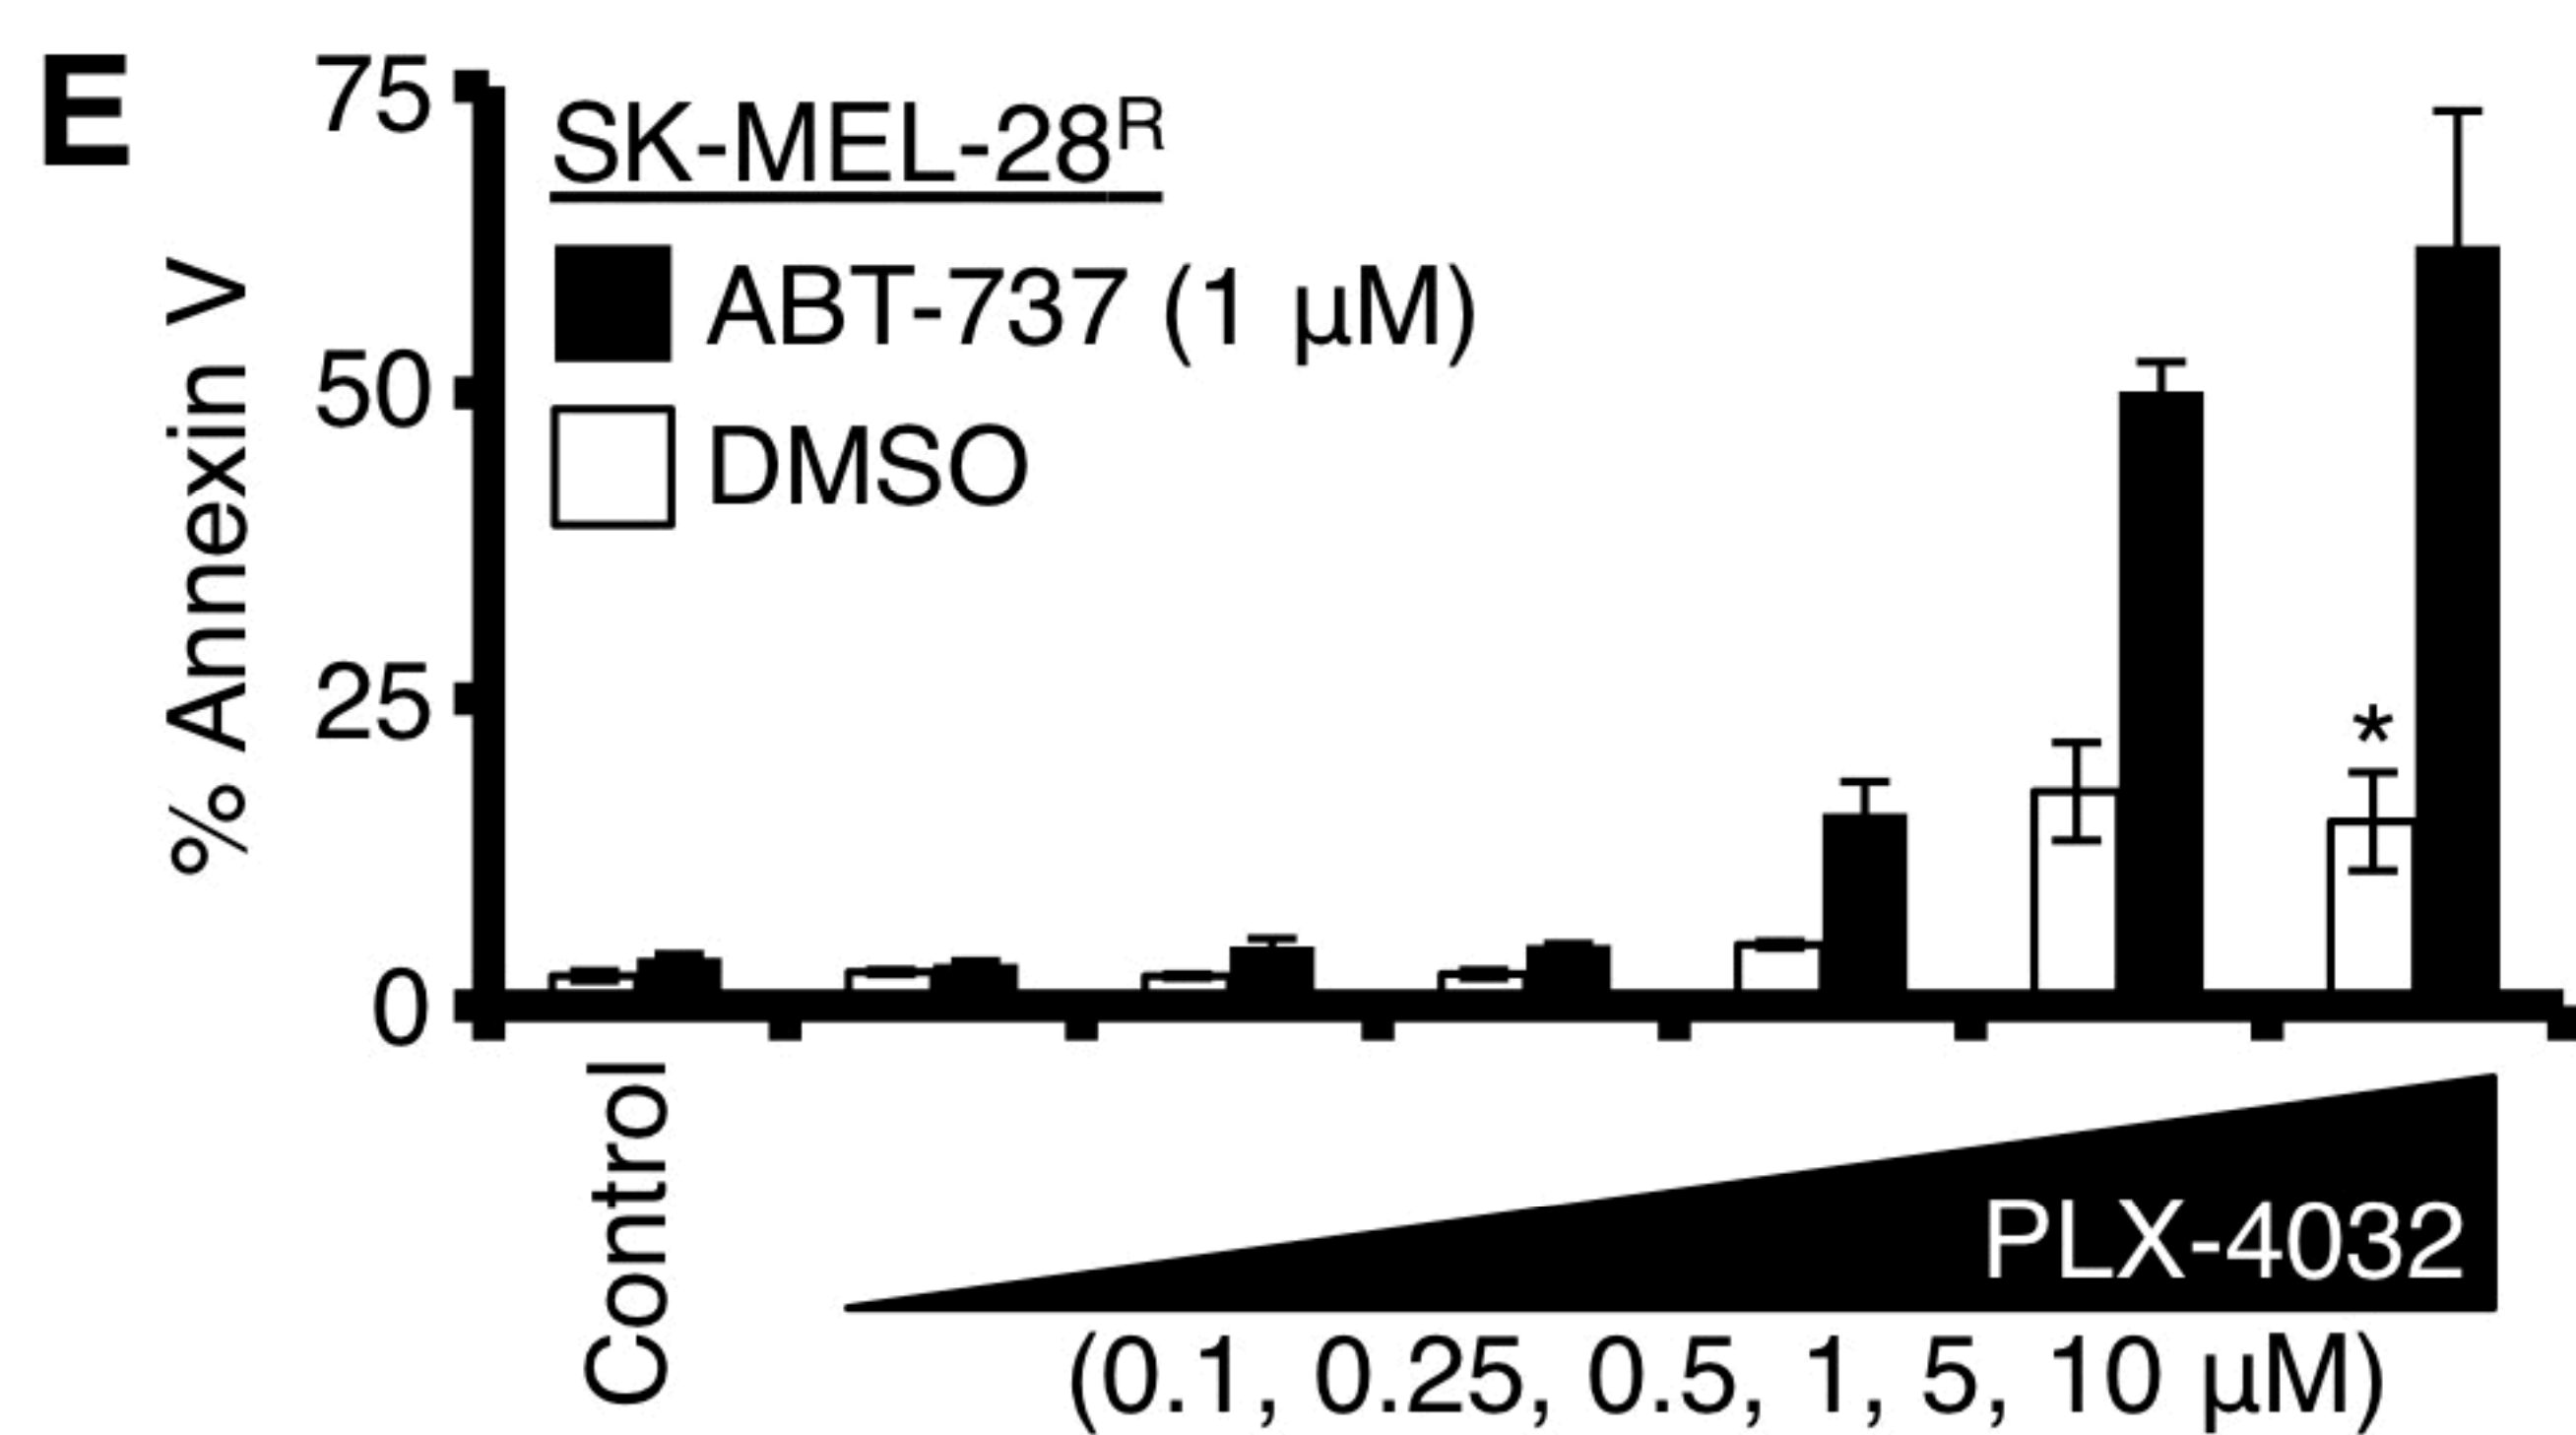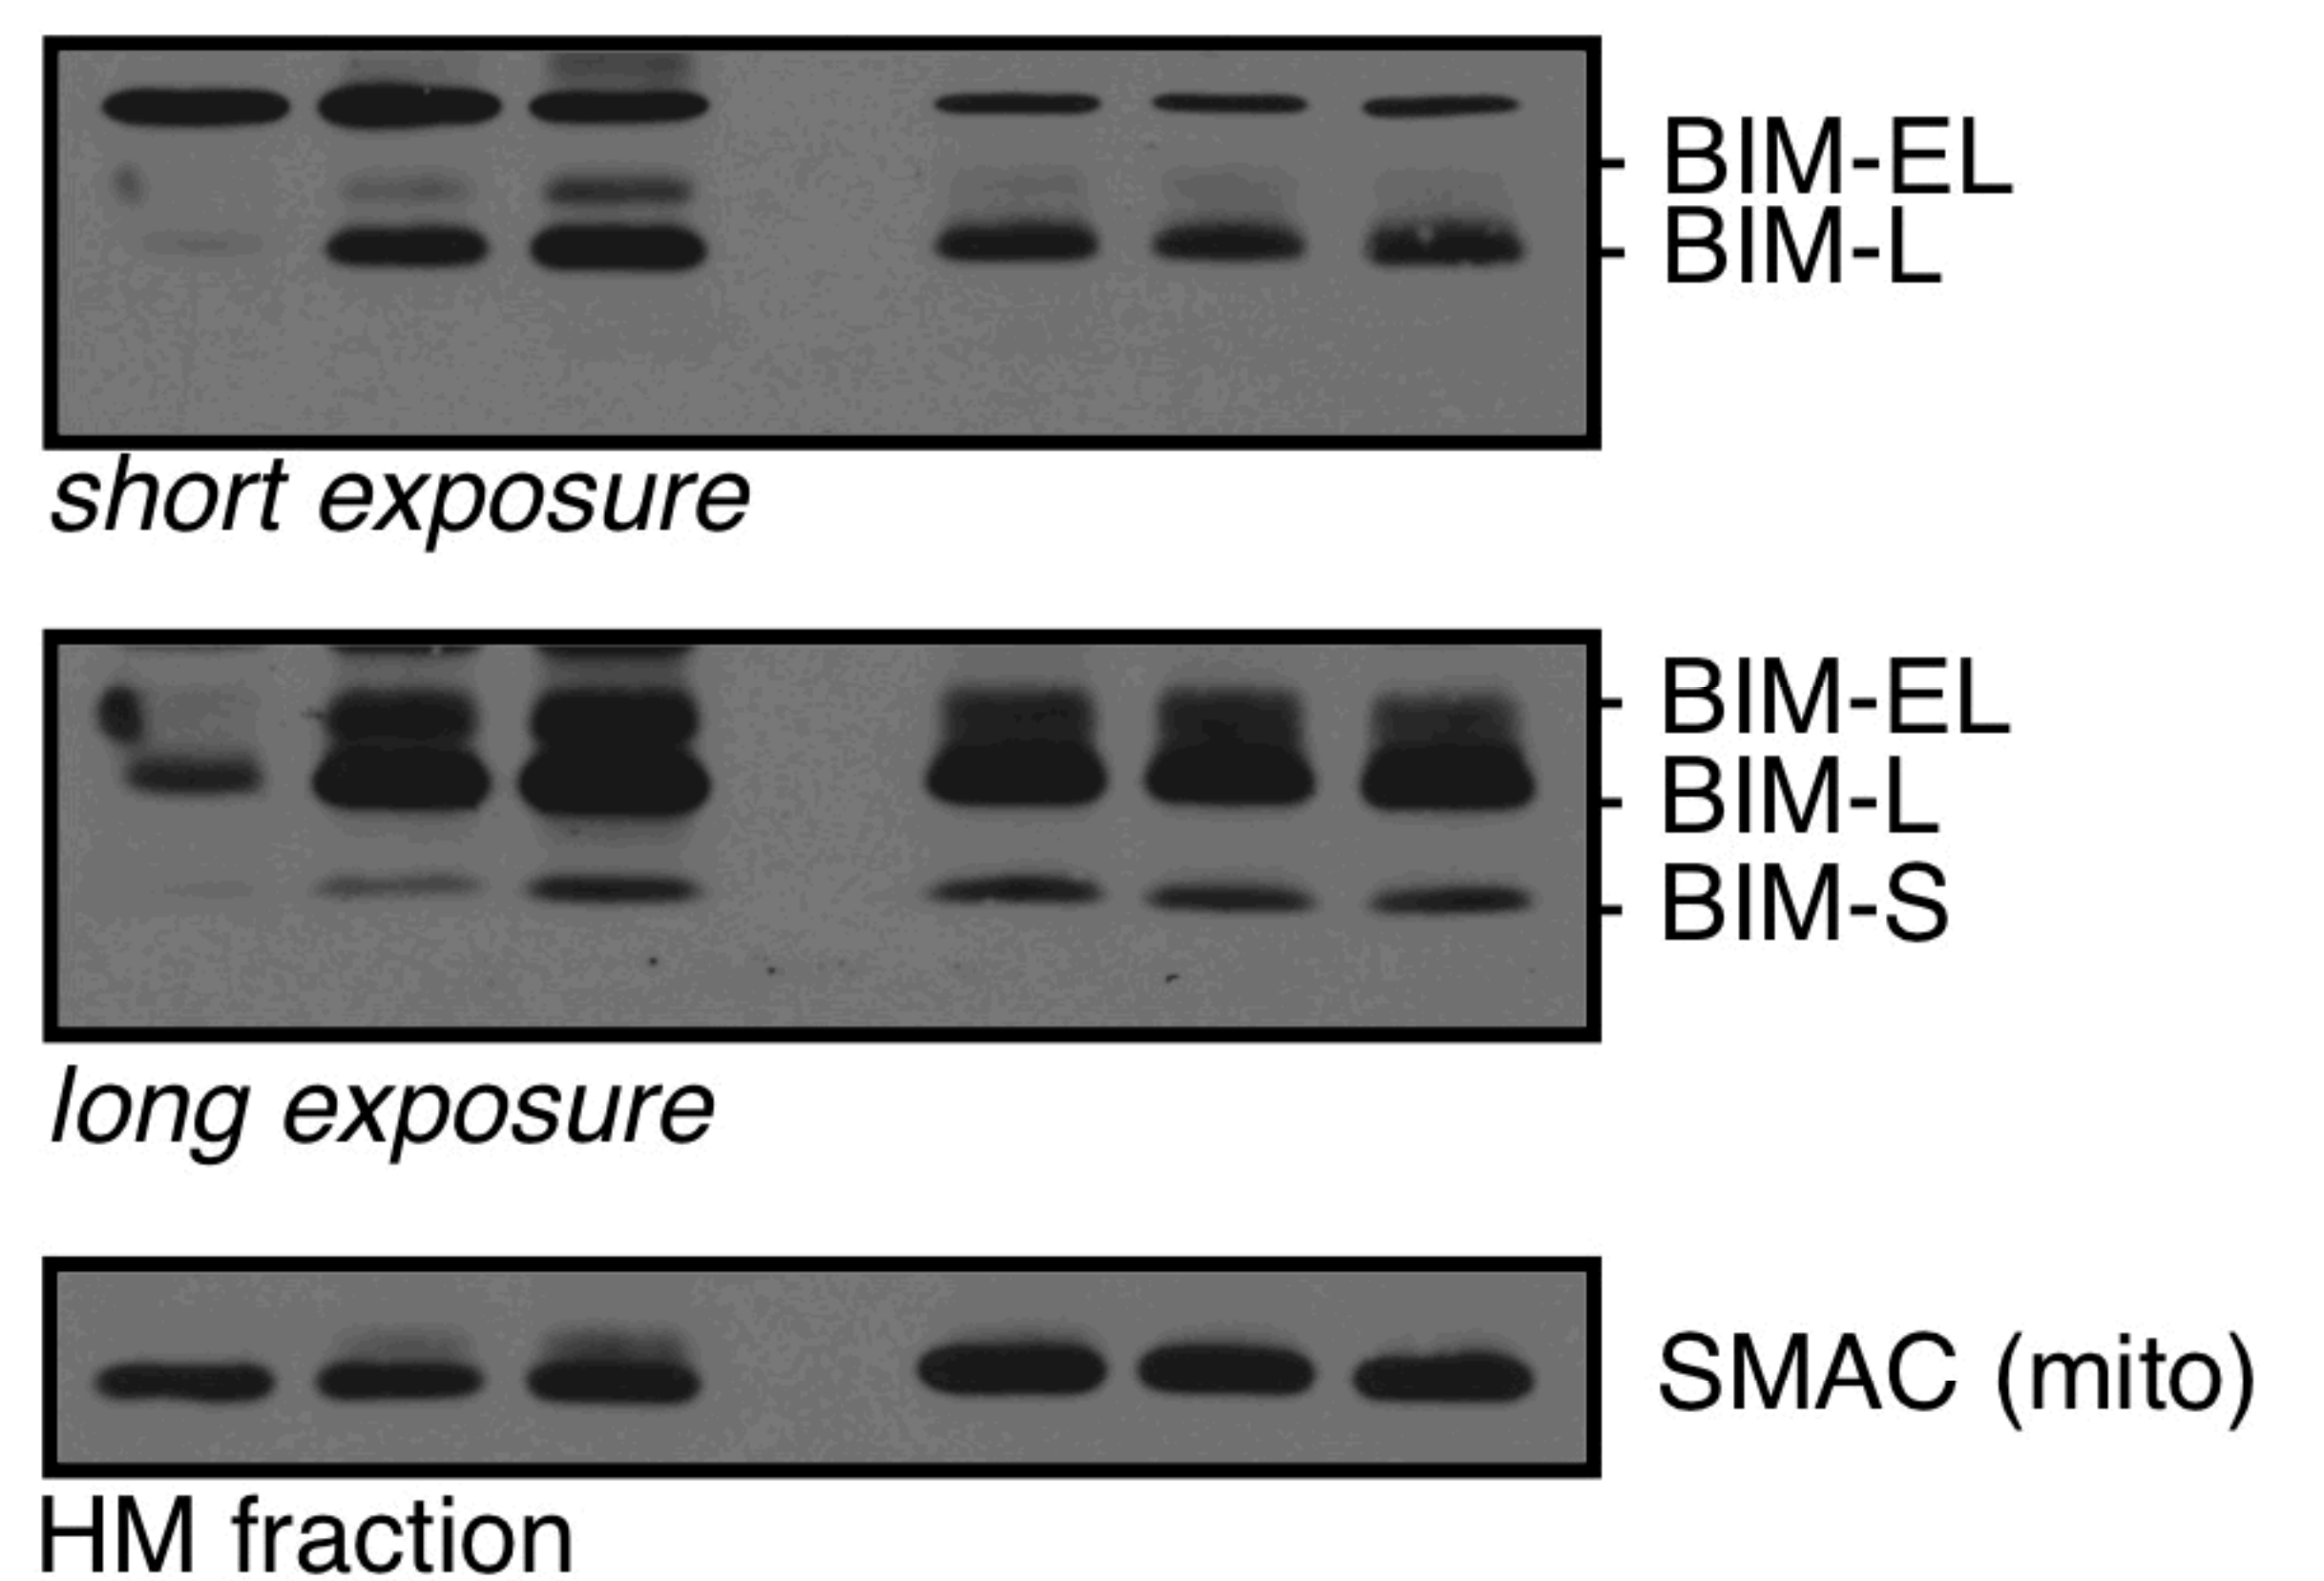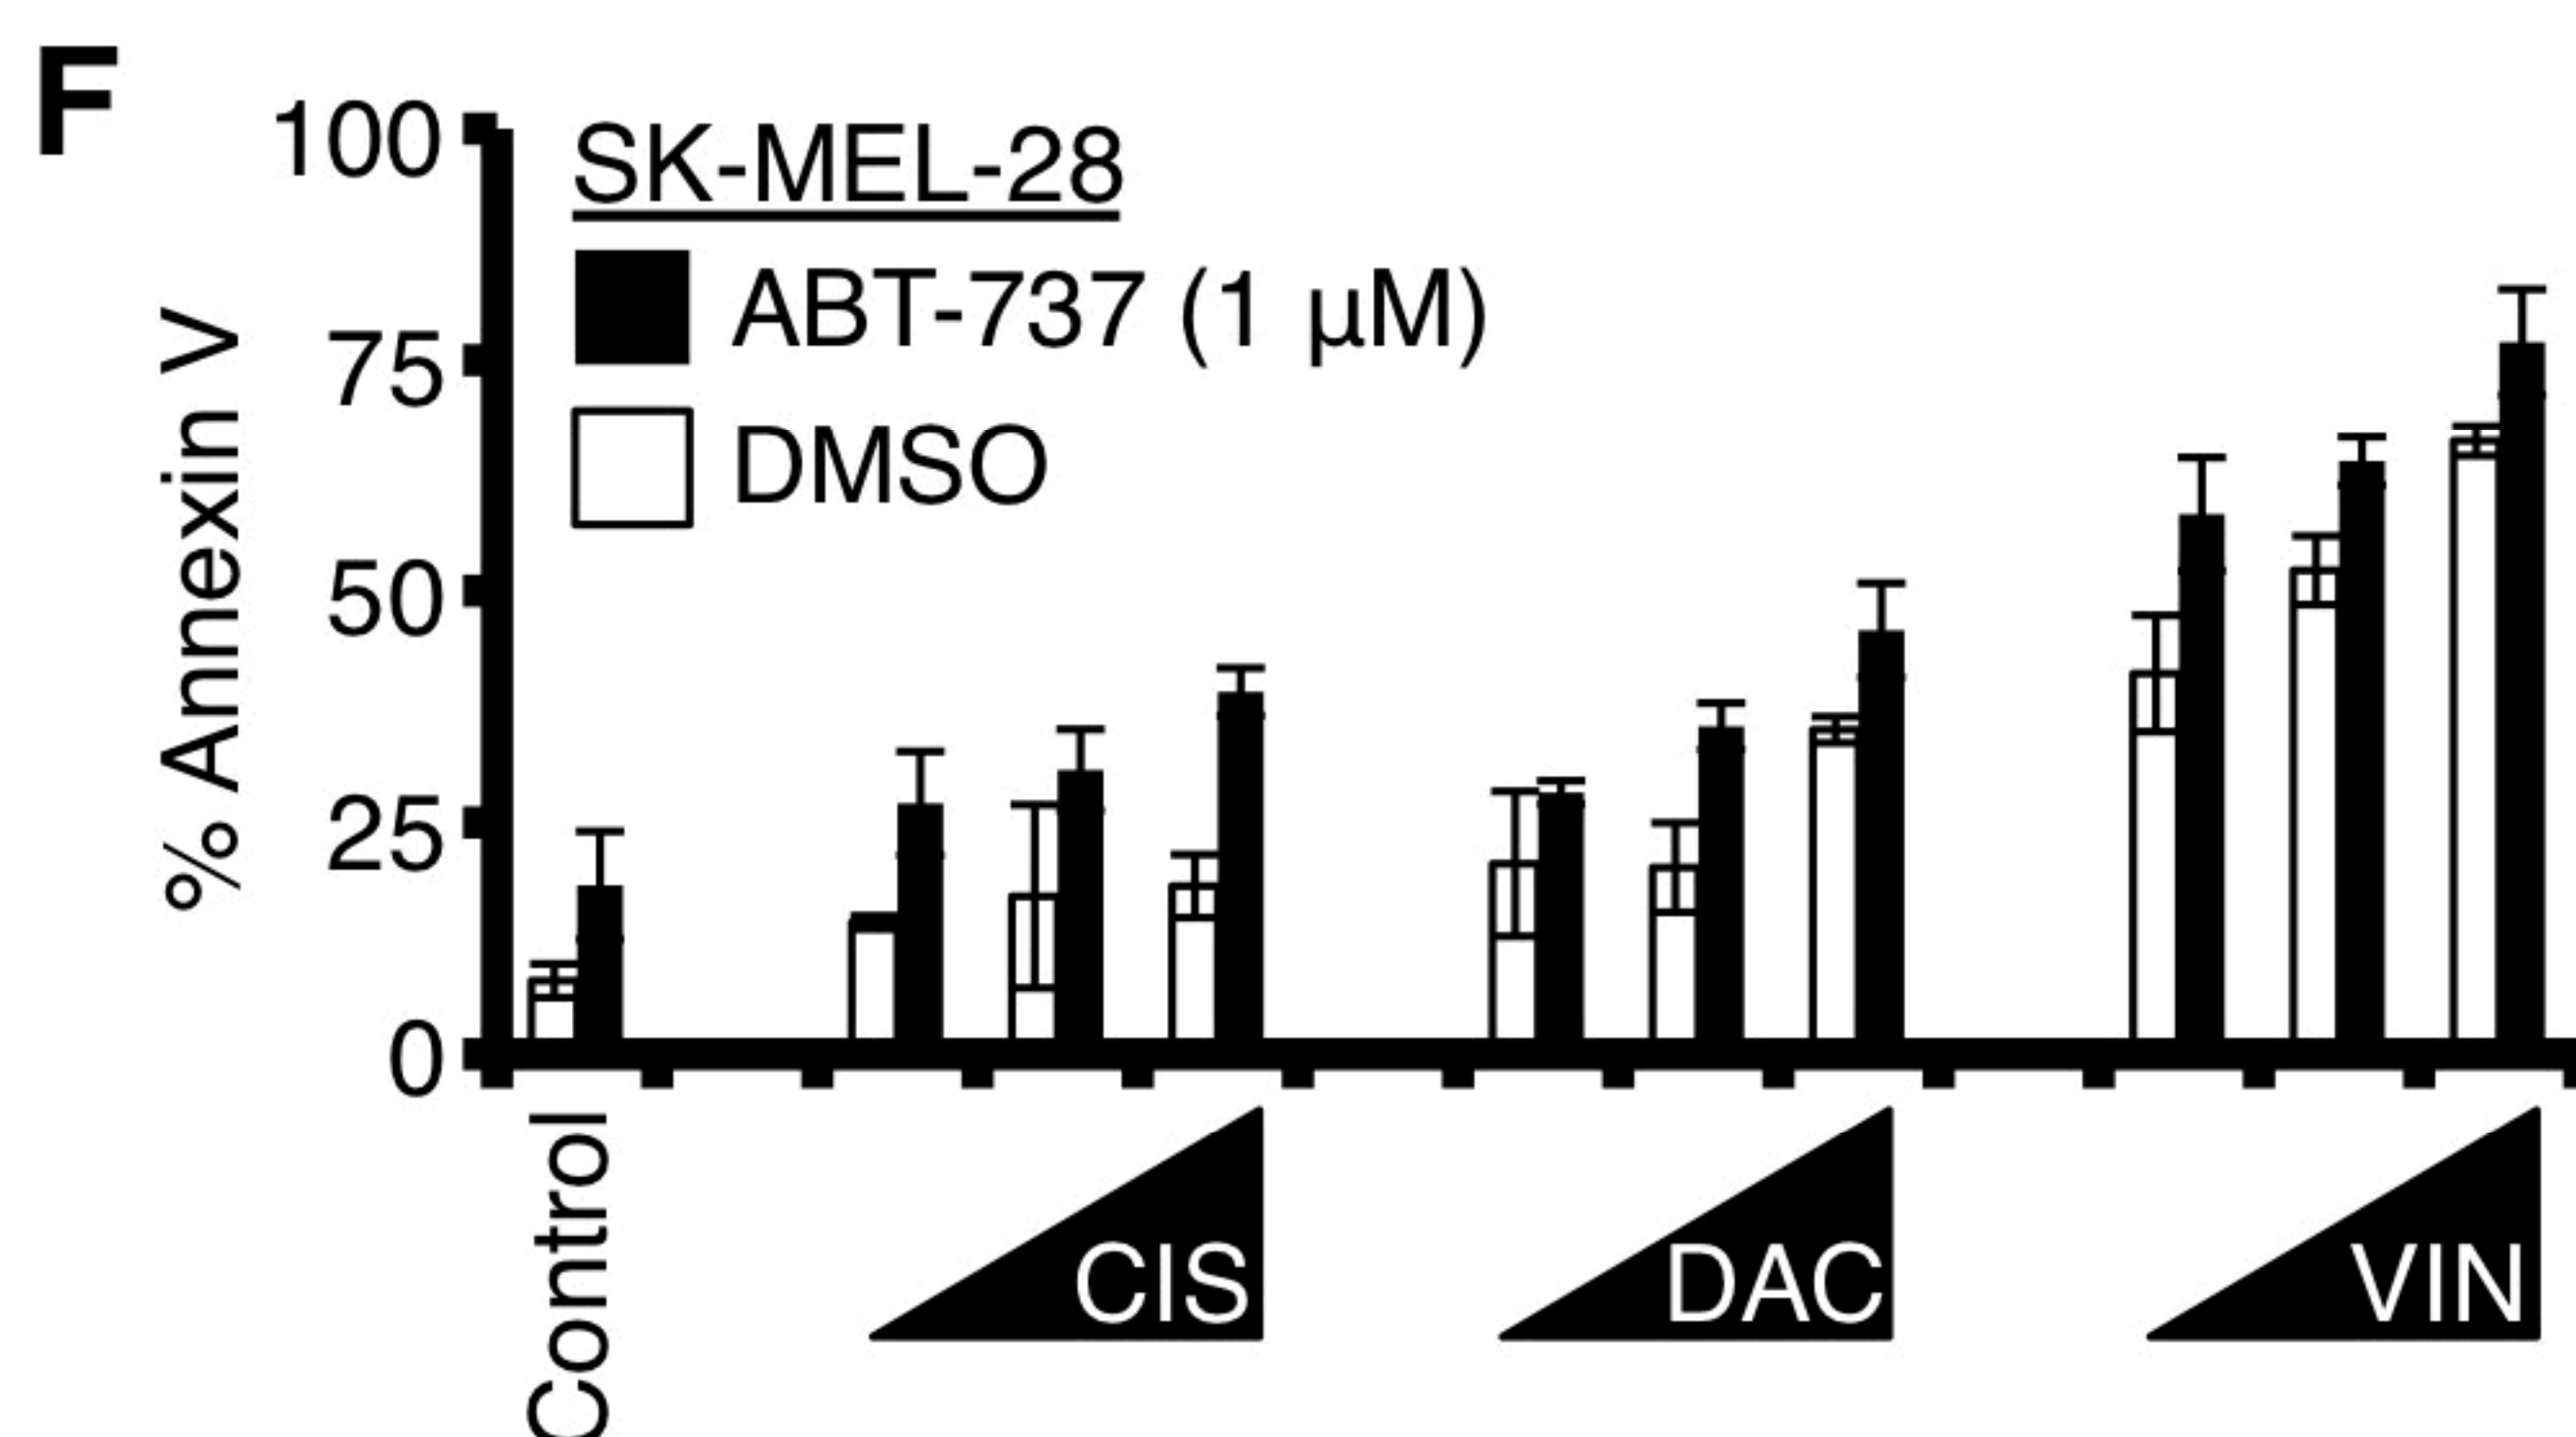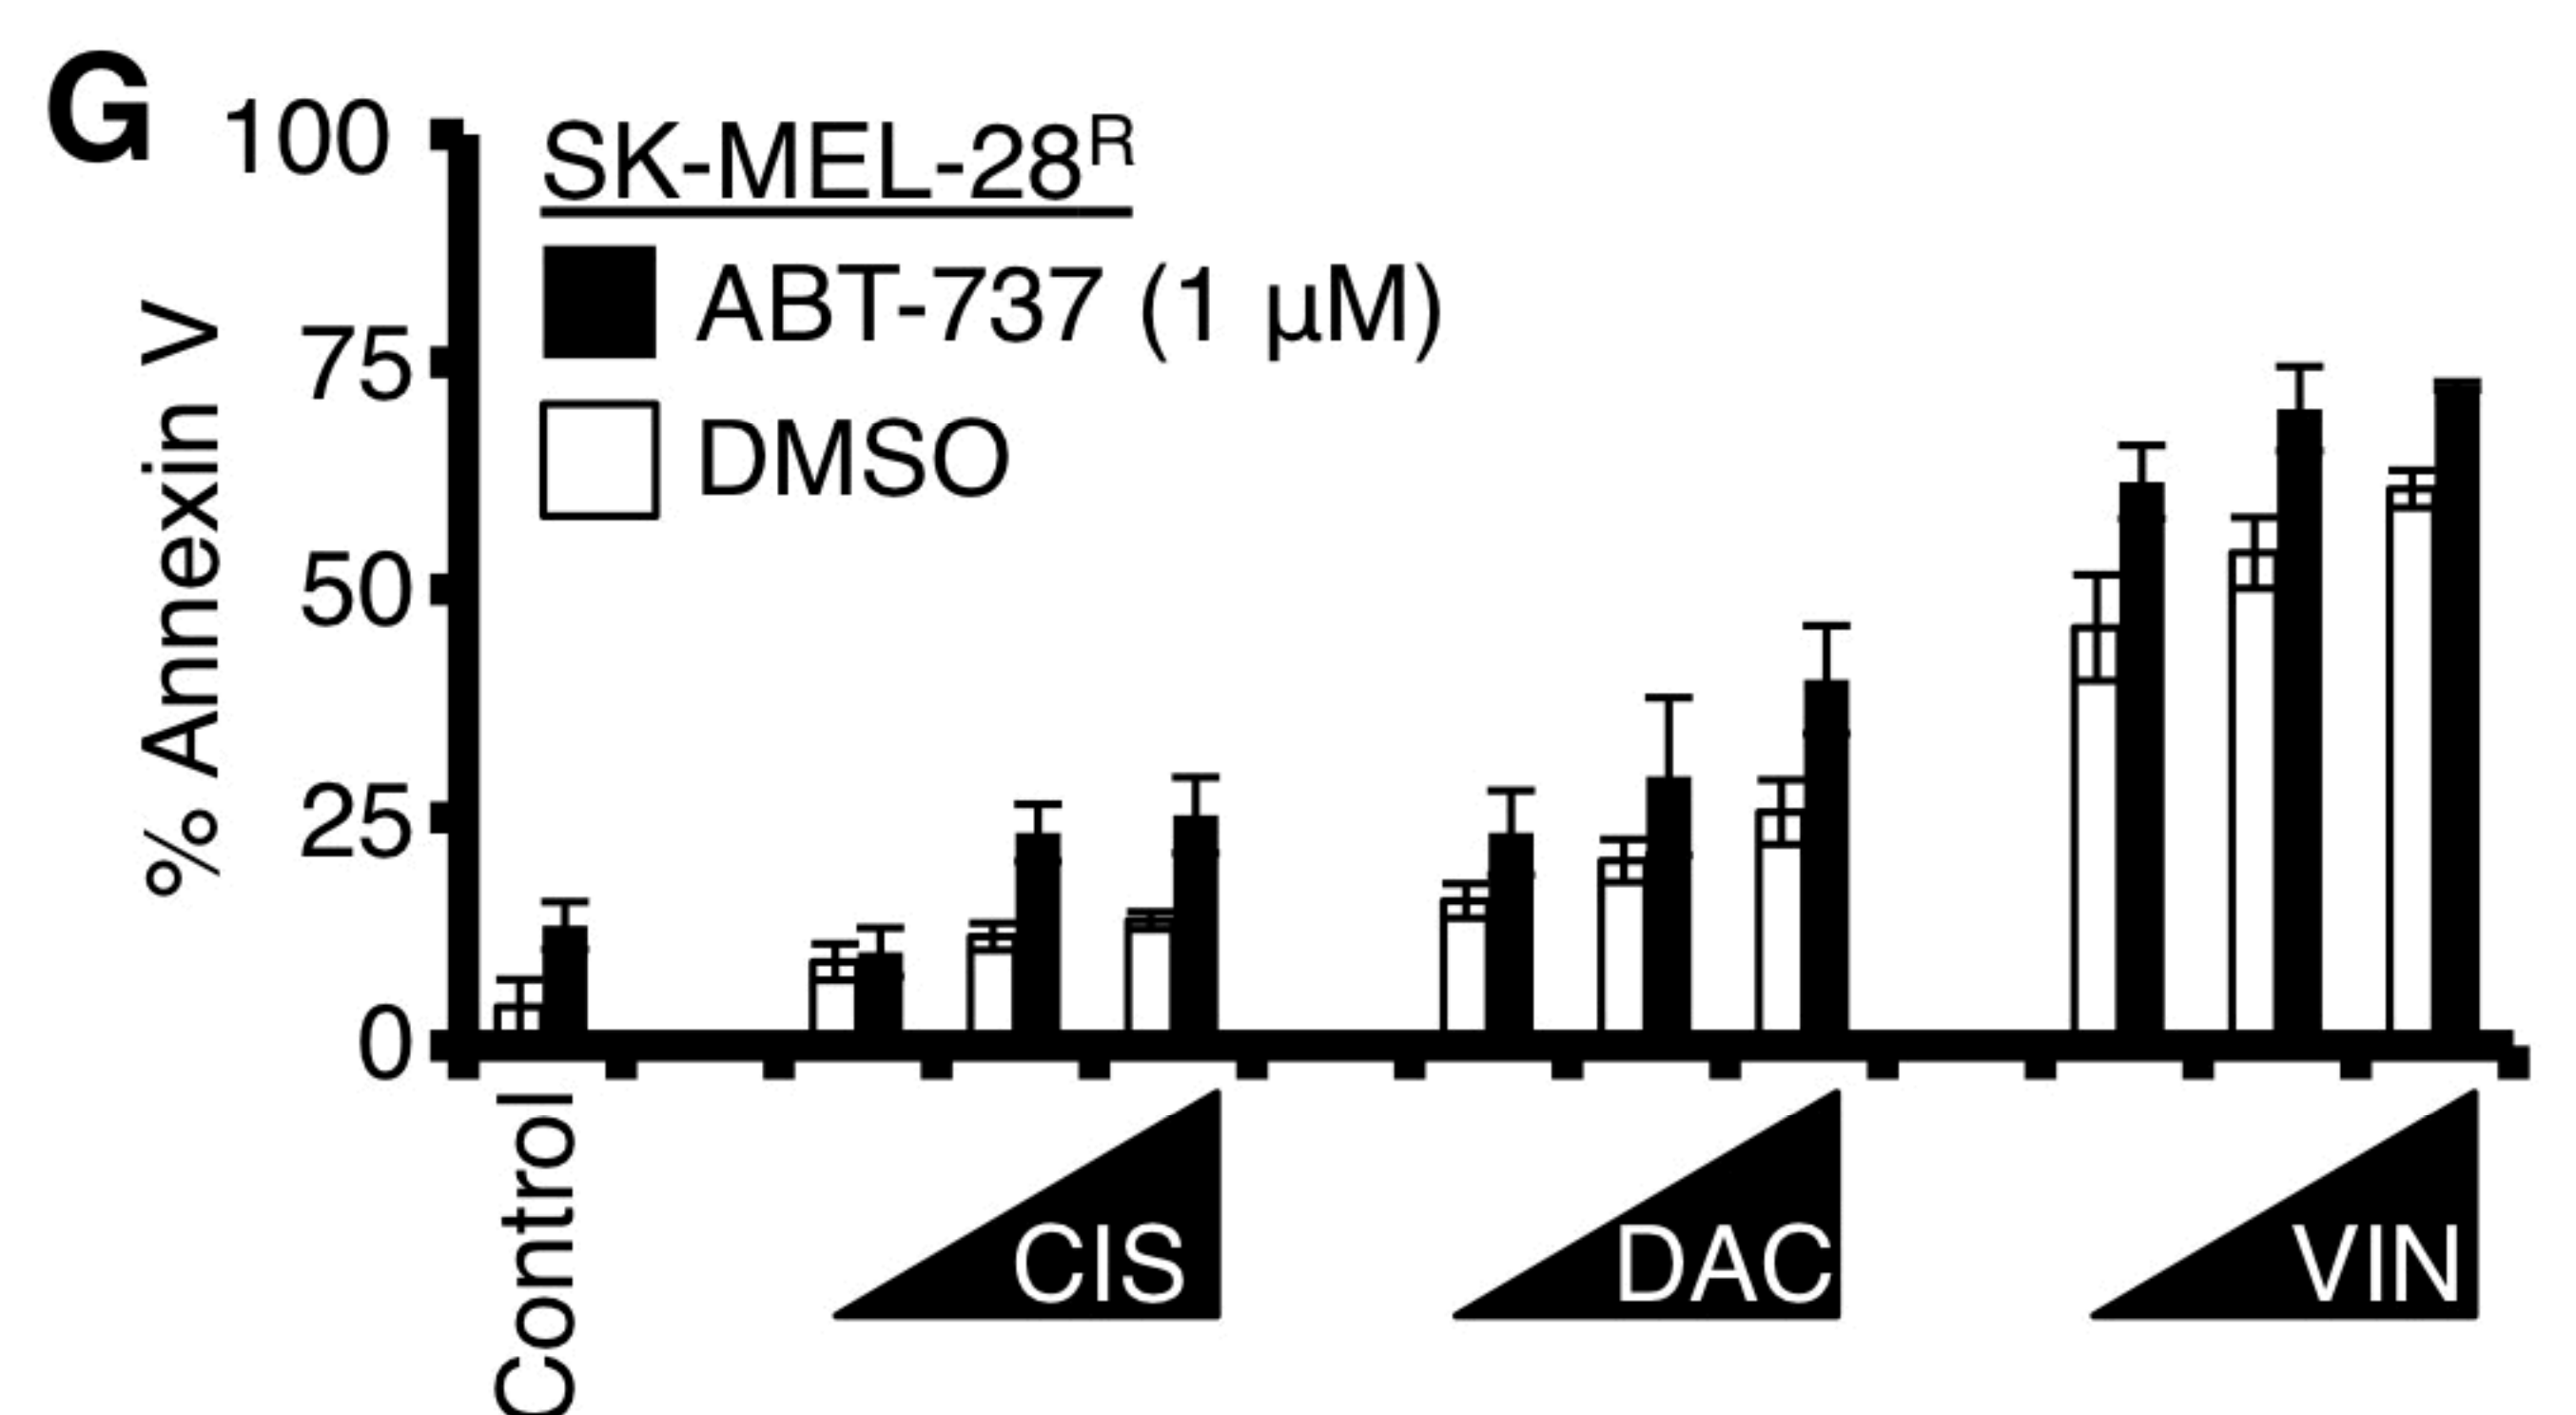

The NIHMS has received the file 'supp\_info\_1.doc' as supplementary data. The file will not appear in this PDF Receipt, but it will be linked to the web version of your manuscript.
